# Supplementary material for: Efficient oxidative coupling of amines to imines under natural sunlight using a benzothiadiazole-based molecular photocatalyst
Source: Royal Society of Chemistry journal article supplement (doi:10.1039/d4ma00990h), 2025-01-01
Supplement: d4ma00990h1.pdf [file d4ma00990h1.pdf]

## Supporting Information

**Efficient Oxidative Coupling of Amines to Imines in Natural Sunlight using  
Benzothiadiazole-based Molecular Photocatalyst**

**Ajeet Singh<sup>a</sup>, Bidisa Das<sup>\*b</sup> and Saumi Ray<sup>\*a</sup>**

**<sup>a</sup>Department of Chemistry**

**Birla Institute of Technology and Science (BITS), Pilani, Pilani Campus, Rajasthan  
333031, India**

**<sup>b</sup>Research Institute for Sustainable Energy (RISE),**

**TCG-CREST, Salt Lake, 700091, Kolkata, India**

**Email: [p20200434@pilani.bits-pilani.ac.in](mailto:p20200434@pilani.bits-pilani.ac.in), [bidisa.das@tcgcrest.org](mailto:bidisa.das@tcgcrest.org),  
[saumi@pilani.bits-pilani.ac.in](mailto:saumi@pilani.bits-pilani.ac.in)**

**Corresponding Author: [bidisa.das@tcgcrest.org](mailto:bidisa.das@tcgcrest.org), [saumi@pilani.bits-pilani.ac.in](mailto:saumi@pilani.bits-pilani.ac.in)**

## Table of contents

|     |                                                                                      |         |
|-----|--------------------------------------------------------------------------------------|---------|
| 1.  | Materials, characterization and computational methodology section.                   | S3-S4   |
| 2.  | $^1\text{H}$ & $^{13}\text{C}$ NMR and HRMS spectra of Ph-BT-Ph.                     | S5-S6   |
| 3.  | Digital photograph of the photocatalytic reaction setup.                             | S7      |
| 4.  | Optimization of reaction time and amount of catalyst.                                | S8      |
| 5.  | Average temperature and intensity measurement during the reaction.                   | S8      |
| 6.  | Gas chromatography retention time.                                                   | S9      |
| 7.  | GC chromatogram of photocatalytic reaction mixture.                                  | S9-S12  |
| 8.  | $^1\text{H}$ and $^{13}\text{C}$ NMR spectra of the photocatalytic reaction mixture. | S13-S24 |
| 9.  | HRMS data of photocatalytic reaction.                                                | S25-S28 |
| 10. | HRMS data of BNA-TEMPO adduct.                                                       | S28     |
| 11. | Detection of the $\text{H}_2\text{O}_2$ in the reaction mixture.                     | S29     |
| 12. | Nessler reagent test for ammonia detection.                                          | S30     |
| 13. | Long-term stability of the photocatalyst Ph-BT-Ph.                                   | S30     |
| 14. | Reusability study of the photocatalyst.                                              | S31     |
| 15. | Details from DFT studies.                                                            | S31-S41 |
| 16. | Comparison of photocatalytic reaction results with existing literature.              | S42-S43 |
| 17. | References.                                                                          | S44-S46 |

## Materials

We have procured the 4,7-Dibromo-2,1,3-benzothiadiazole (98% GC), Pd(PPh<sub>3</sub>)<sub>4</sub>, 2-(aminomethyl)thiophene (98% GC), and phenylboronic acid from the TCI chemicals. CDH Fine Chemicals supplied bromobenzene (98% GC), sodium sulphate anhydrous (99%), tert-butyl alcohol, DMSO-d<sub>6</sub>, and deuterated chloroform (CDCl<sub>3</sub>). We have bought benzylamine (99%), 4-fluoro benzylamine (97%), KI (99%), TEMPO, p-benzoquinone (98%), TEMP (>99%), DMPO and 2-methoxy benzylamine (98%) from Sigma-Aldrich. Merck supplied the BaSO<sub>4</sub>, K<sub>2</sub>CO<sub>3</sub>, toluene, and acetonitrile. Hexane, methanol, and ethyl acetate were purchased from Qualigen Chemicals. Thermo-Scientific supplied 4-methyl benzylamine (98%), 2-(aminomethyl)pyridine (98%), CuCl<sub>2</sub> (99%), and 4-methoxy benzylamine (98%). All the chemicals and solvents utilized in this study were used as received without any additional purification.

## Characterization

<sup>1</sup>H & C-13 NMR spectra were recorded on the 400 MHz Bruker NMR instrument in CDCl<sub>3</sub> solvent, and data are reported in the ppm unit. HRMS study were recorded on the Agilent 6545 Q-TOF LC-MS spectrometer by using the electrospray ionization method in the positive mode in acetonitrile solvent. Perkin Elmer LAMBDA 1050+ UV/Vis/NIR spectrophotometer was used to record the solution state absorption spectra in 2nm data interval mode. Photoluminescence spectra were recorded on the Fluorolog-3 instrument. Photoluminescence lifetime studies were recorded at room temperature using the Horiba Delta Flex 01 instrument. Gas-chromatography study for the catalysis was done using the Shimadzu GC-2014 with an FID detector and column RTX-5 in an autosampler mode using 0.5µl injection volume and bromobenzene as an internal standard. EPR/ESR measurements were recorded using the Bruker A300-9.5/12/S/W at room temperature using the UV-visible 100W Hg lamp as a light irradiation source. CH instrument (CHI601E) was used to record the cyclic voltammetry studies using the NBu<sub>4</sub>PF<sub>6</sub> as an electrolyte in acetonitrile, and the Ag/AgCl as a reference electrode, platinum wire as a counter electrode, glassy carbon electrode was used as a working electrode. Intensity of the sunlight was measured using the Newport power meter 843-R at 500nm wavelength.

## Computational Methodology

All studies for the photocatalyst and related complexes were performed using density functional theory (DFT) as implemented in the GAUSSIAN 16, suite of *ab initio* quantum chemistry program.<sup>1</sup> Geometry optimizations and vibrational frequency calculations were done using hybrid B3LYP<sup>2-4</sup> functional with the double-zeta quality 6-311+G\*\* basis set for all atoms. The default SCF and geometry convergence criteria were used, and no symmetry constraints were imposed for the structural optimizations. Harmonic frequency analysis was employed to characterize the stationary points as stable structures. The frontier molecular orbitals and the energy gap between the highest occupied molecular orbital (HOMO) and lowest unoccupied molecular orbital (LUMO) and molecular electrostatic potential are calculated using B3LYP functional. Calculation of atomic charges were done using the Merz-Singh-Kollman approach<sup>5, 6</sup> which gives more accurate results compared to conventional Mulliken scheme.

For any chemical reaction, Reactants  $\rightarrow$  Products, the Gibb's free energy of reaction is calculated as  $\Delta G_{\text{reaction}} = \sum_{\text{products}} G - \sum_{\text{reactants}} G$ , where  $\Delta G$  represents the sum of electronic and thermal free energies of the corresponding species. To model the solution phase of the photocatalyst and photocatalyst complexes, we have conducted full optimization followed by vibrational frequency calculation in solvent using the self-consistent reaction field (SCRF) method and density-based model (SMD)<sup>7, 8</sup> employing implicit solvation with ACN as a solvent. The binding energy ( $E_{\text{bind}}$ ) of the adsorbates to Ph-BT-Ph molecule is calculated using the equation below:

$$E_{\text{bind}} = E_{[\text{Ph-BT-Ph}]\text{-adsorbate}} - (E_{\text{Ph-BT-Ph}} + E_{\text{adsorbate}})$$

Here  $E_{[\text{Ph-BT-Ph}]\text{-adsorbate}}$  represents the energy of the Ph-BT-Ph bound to the respective adsorbate molecule, BNA or Oxygen, the energy of the pristine Ph-BT-Ph is  $E_{\text{Ph-BT-Ph}}$  and  $E_{\text{adsorbate}}$  gives the energy of the free BNA or  $\text{O}_2$  as applicable respectively. The calculations of excited states on the stable ground-state geometry was carried out by using time-dependent (TD) formalism in DFT (TD-DFT) and the TD-DFT spectrum has been plotted. We also performed structural optimizations on few excited states explored from TD-DFT and investigated their interactions with the reactants.

$^1\text{H}$  NMR (400 MHz,  $\text{CDCl}_3$ )

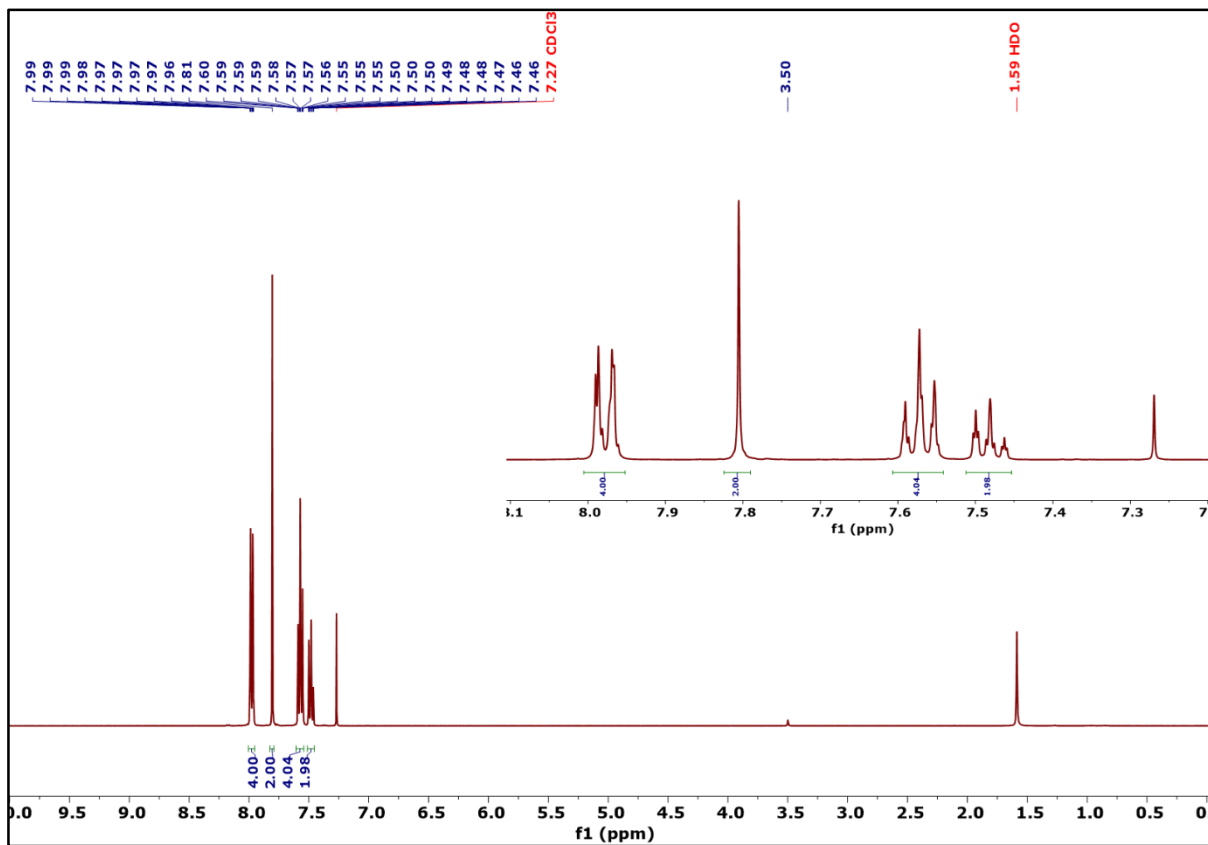

Figure S1  $^1\text{H}$  NMR of Ph-BT-Ph

$^{13}\text{C}$  NMR (101 MHz,  $\text{CDCl}_3$ )

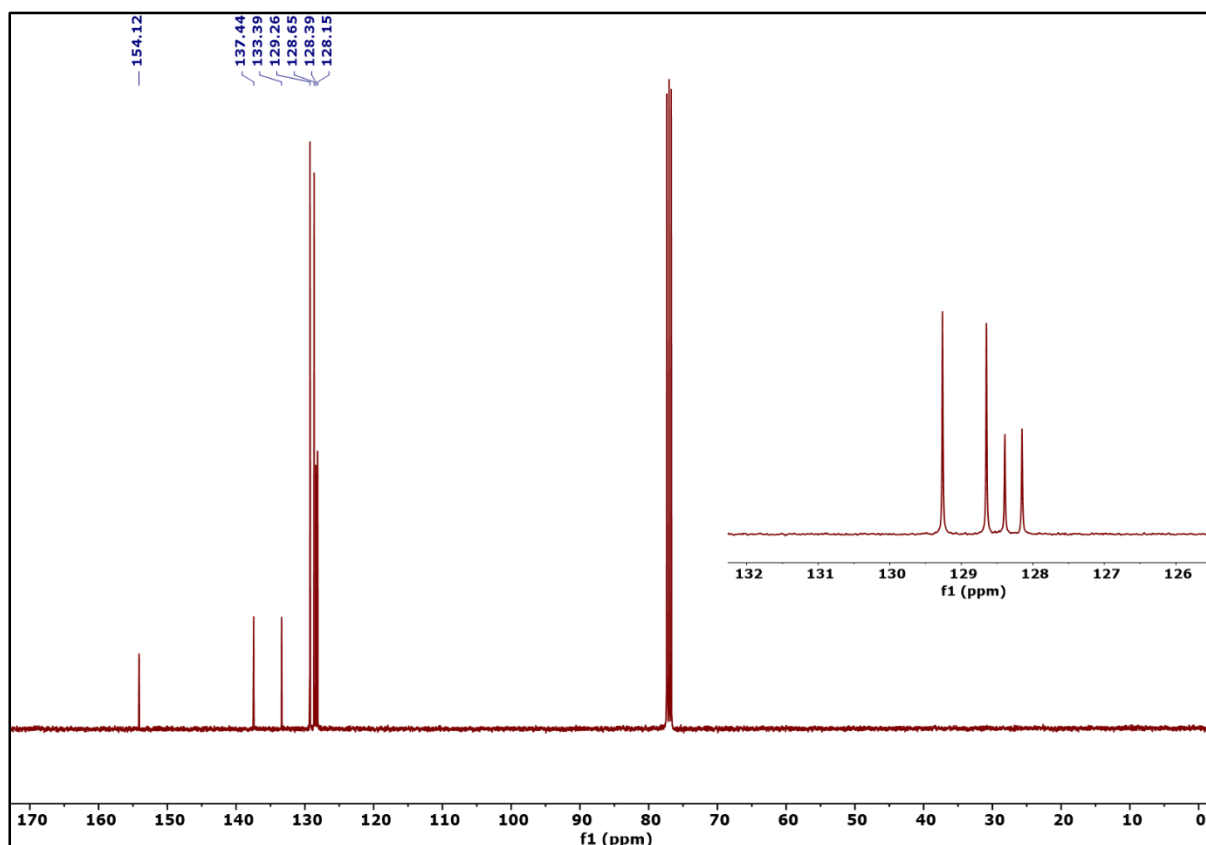

Figure S2  $^{13}\text{C}$  NMR of Ph-BT-Ph

MS Zoomed Spectrum

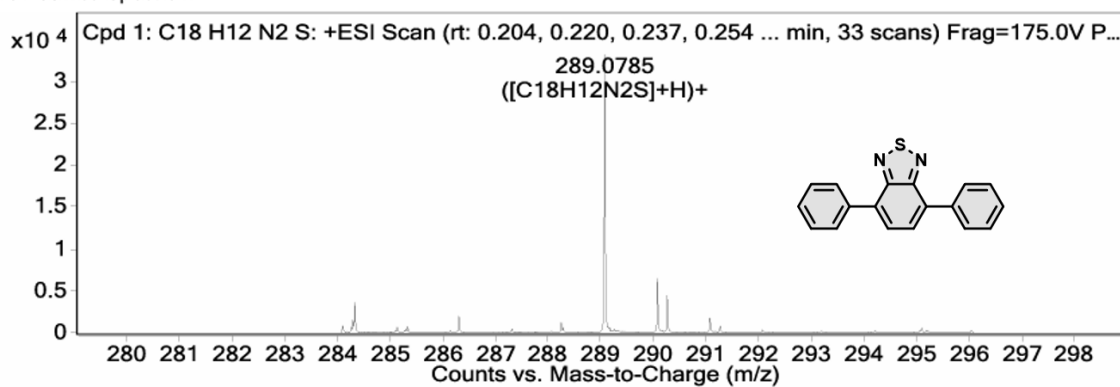

MS Spectrum Peak List

| <i>m/z</i> | <i>Calc m/z</i> | <i>Diff(ppm)</i> | <i>z</i> | <i>Abund</i> | <i>Formula</i>                                   | <i>Ion</i>         |
|------------|-----------------|------------------|----------|--------------|--------------------------------------------------|--------------------|
| 289.0785   | 289.0794        | 3.04             | 1        | 33298.6      | C <sub>18</sub> H <sub>12</sub> N <sub>2</sub> S | (M+H) <sup>+</sup> |
| 290.0815   | 290.0824        | 3.26             | 1        | 6744.17      | C <sub>18</sub> H <sub>12</sub> N <sub>2</sub> S | (M+H) <sup>+</sup> |
| 291.0774   | 291.0785        | 3.62             | 1        | 1798.1       | C <sub>18</sub> H <sub>12</sub> N <sub>2</sub> S | (M+H) <sup>+</sup> |

Figure S3 HRMS spectra of Ph-BT-Ph

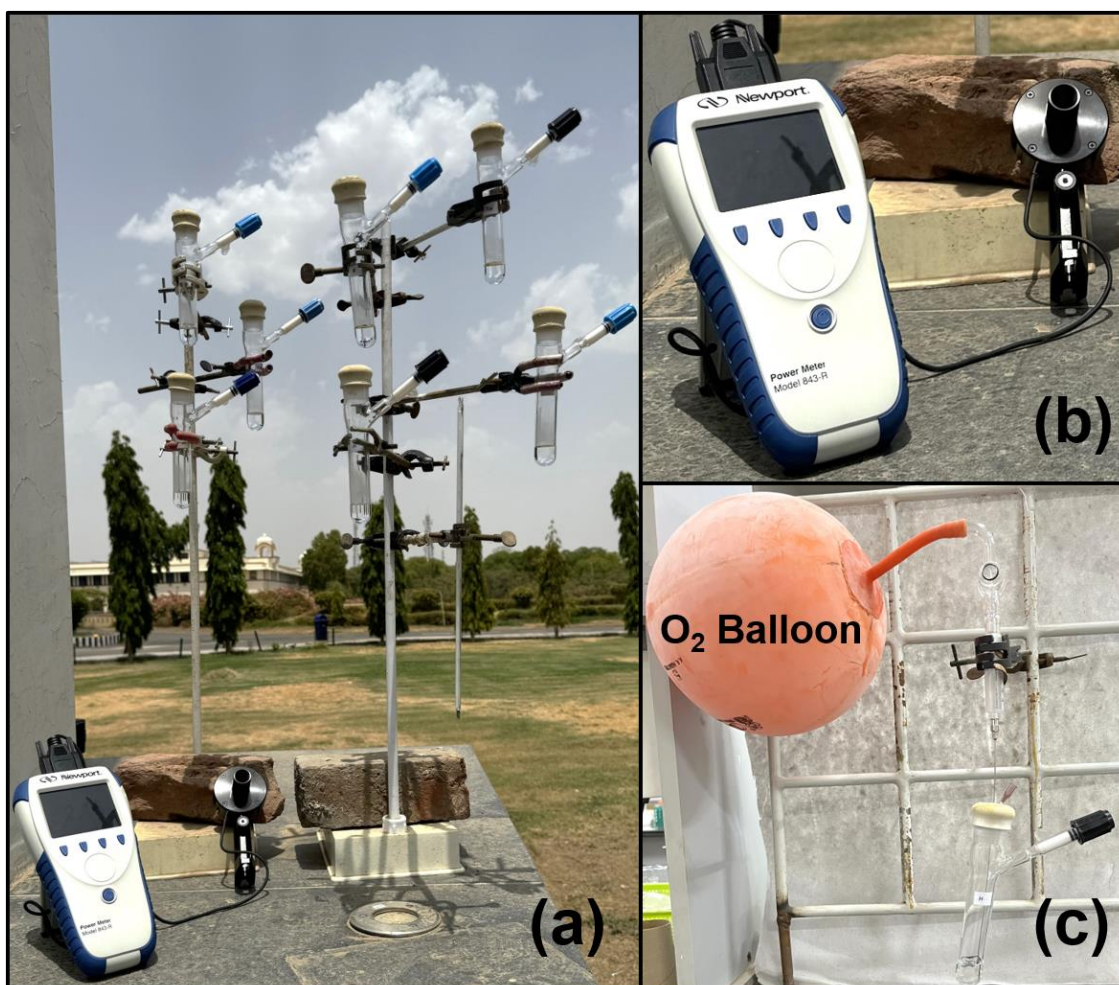

**Figure S4** (a) Digital photograph of the reaction setup in natural sunlight (b) Newport power meter for intensity measurement (c) O<sub>2</sub> purging setup.

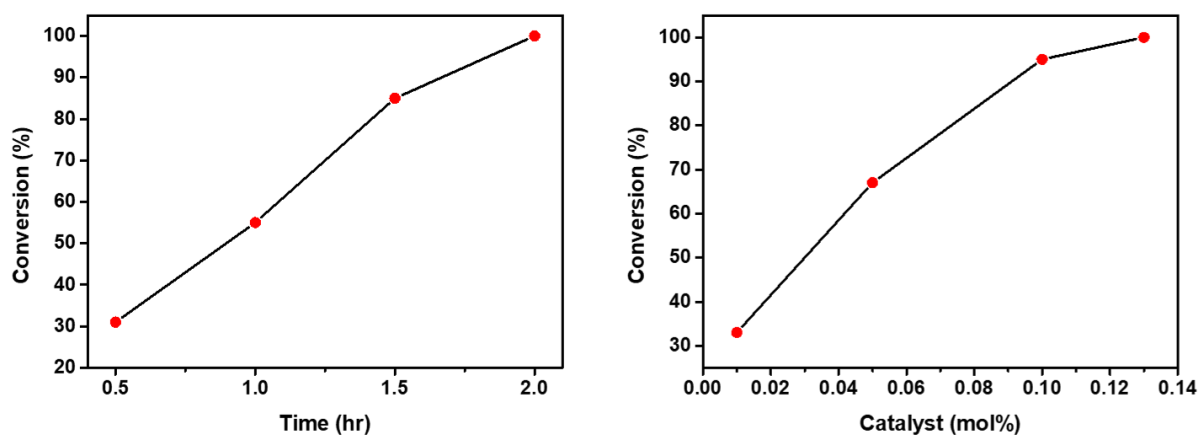

**Figure S5** Optimization of reaction time and amount of catalyst result for oxidative coupling of amine to imine.

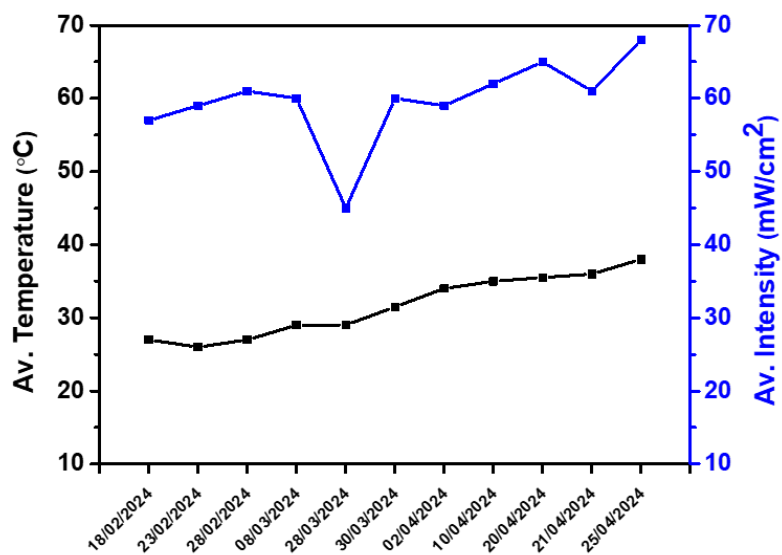

**Figure S6** Average intensity and temperature of sunlight during the reaction time on that day.



**Table S1** GC retention time of reactant and product.

| Reactant  | Retention time of reactant (min) | Retention time of product (min) |
|-----------|----------------------------------|---------------------------------|
| <b>1a</b> | 5.813                            | 15.371                          |
| <b>1b</b> | 7.989                            | 16.830                          |
| <b>1c</b> | 6.159                            | 15.273                          |
| <b>1d</b> | 10.544                           | 20.062                          |
| <b>1e</b> | 10.150                           | 18.716                          |
| <b>1f</b> | 5.925                            | 15.669                          |
| <b>1g</b> | 6.715                            | 15.754                          |

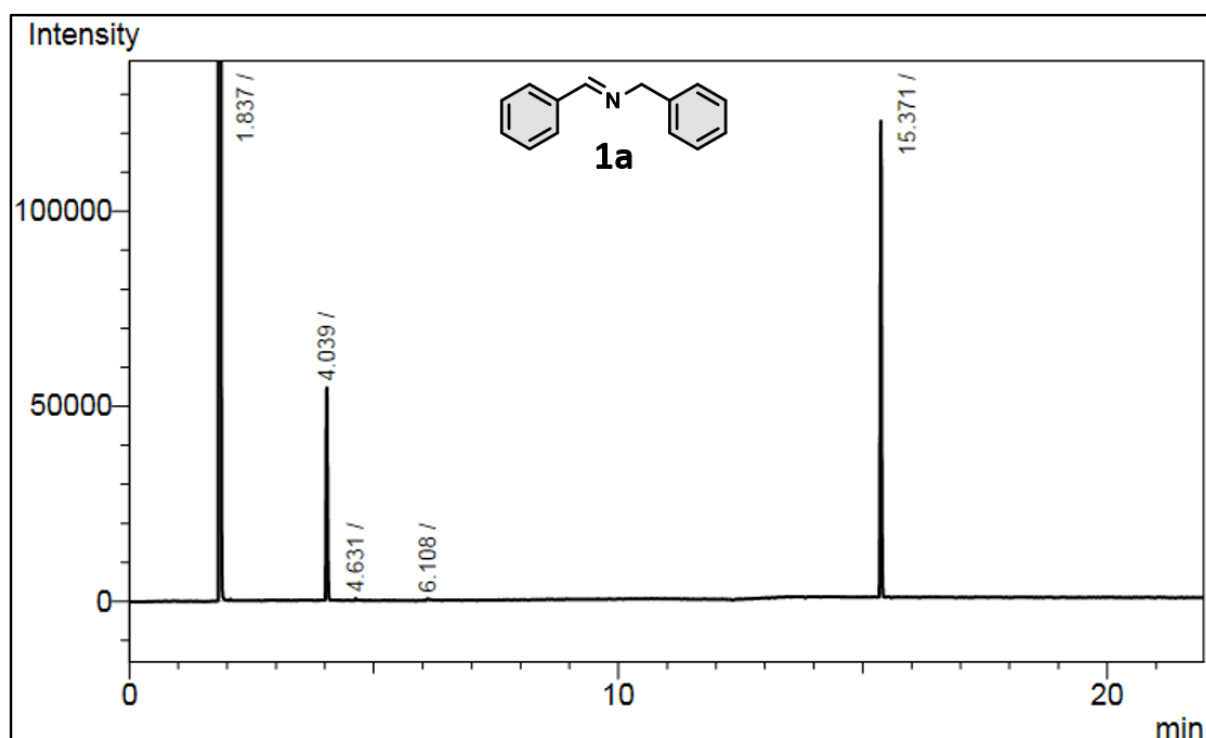

**Figure S7** GC chromatogram of 1a reaction mixture. (Rt. of ACN is 1.837 min & bromobenzene is 4.039 min)

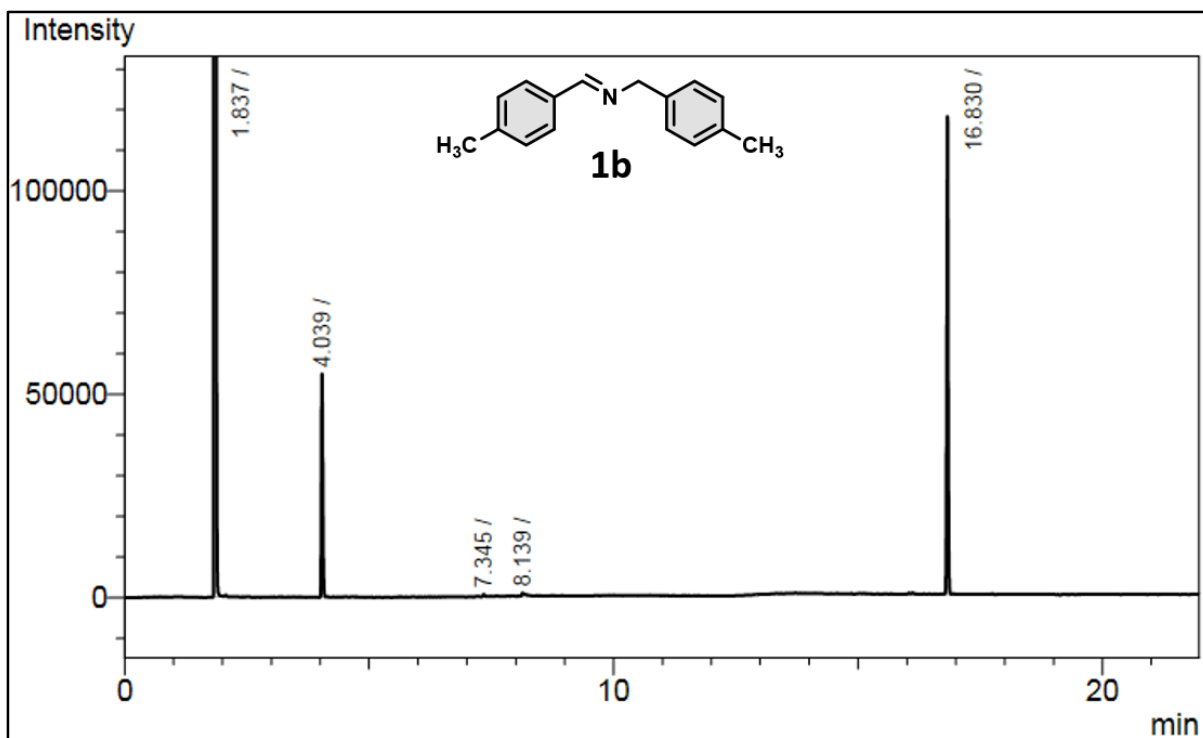

**Figure S8** GC chromatogram of 1b reaction mixture. (Rt. of ACN is 1.837 min & bromobenzene is 4.039 min)

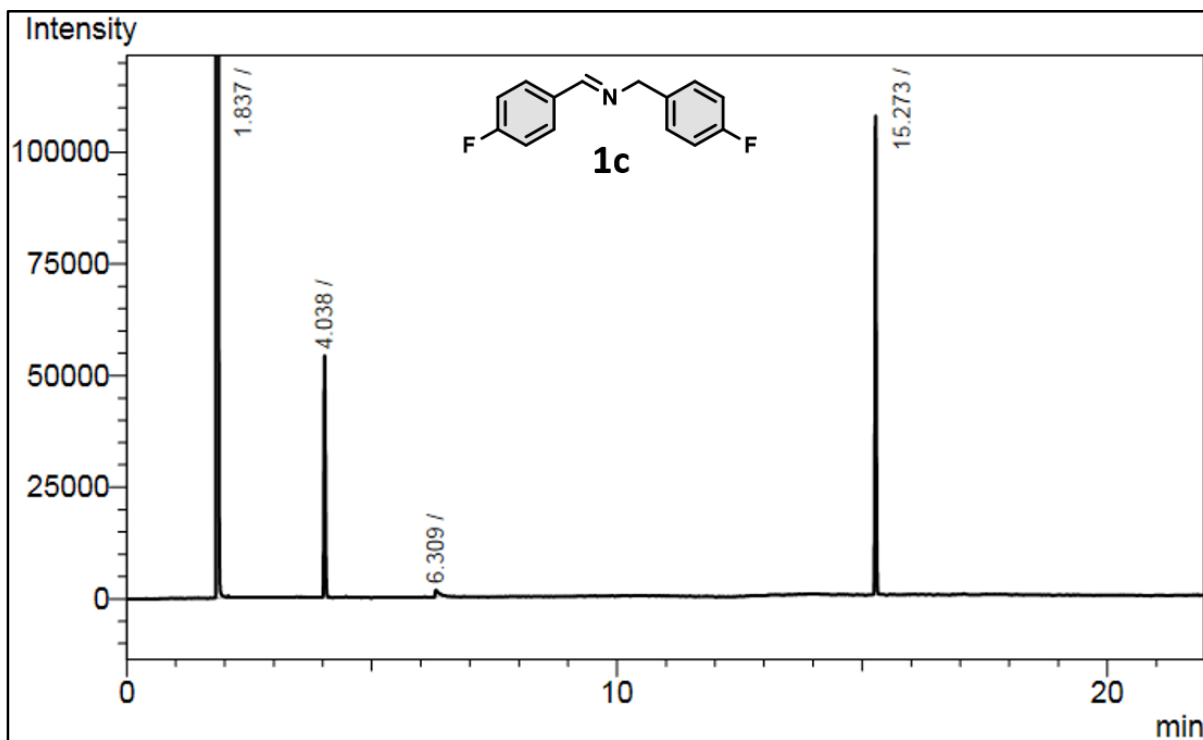

**Figure S9** GC chromatogram of 1c reaction mixture. (Rt. of ACN is 1.837 min & bromobenzene is 4.038 min)

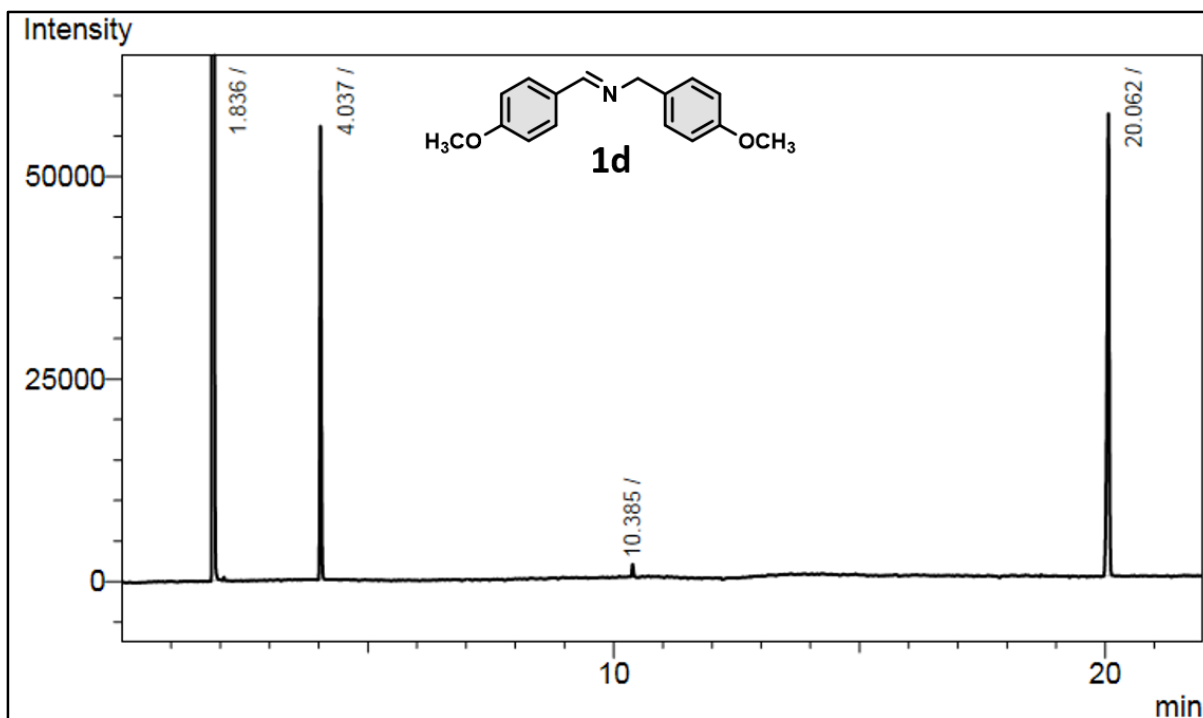

**Figure S10** GC chromatogram of 1d reaction mixture. (Rt. of ACN is 1.836 min & bromobenzene is 4.037 min)

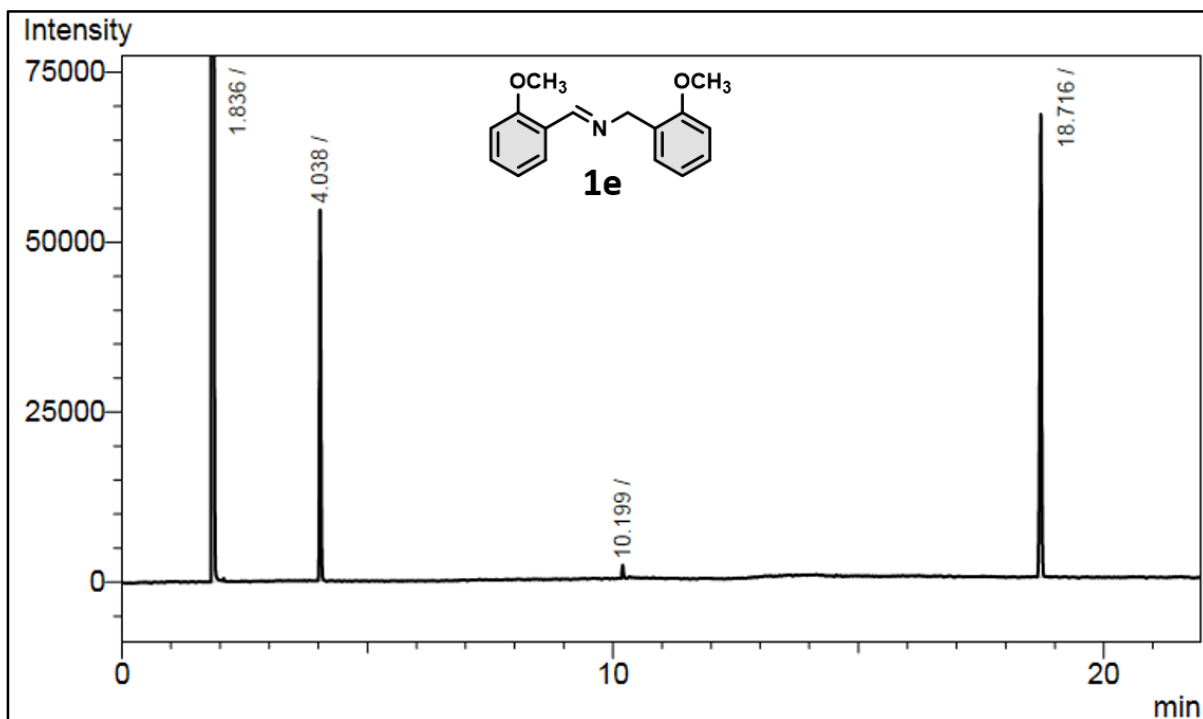

**Figure S11** GC chromatogram of 1e reaction mixture. (Rt. of ACN is 1.836 min & bromobenzene is 4.038 min)

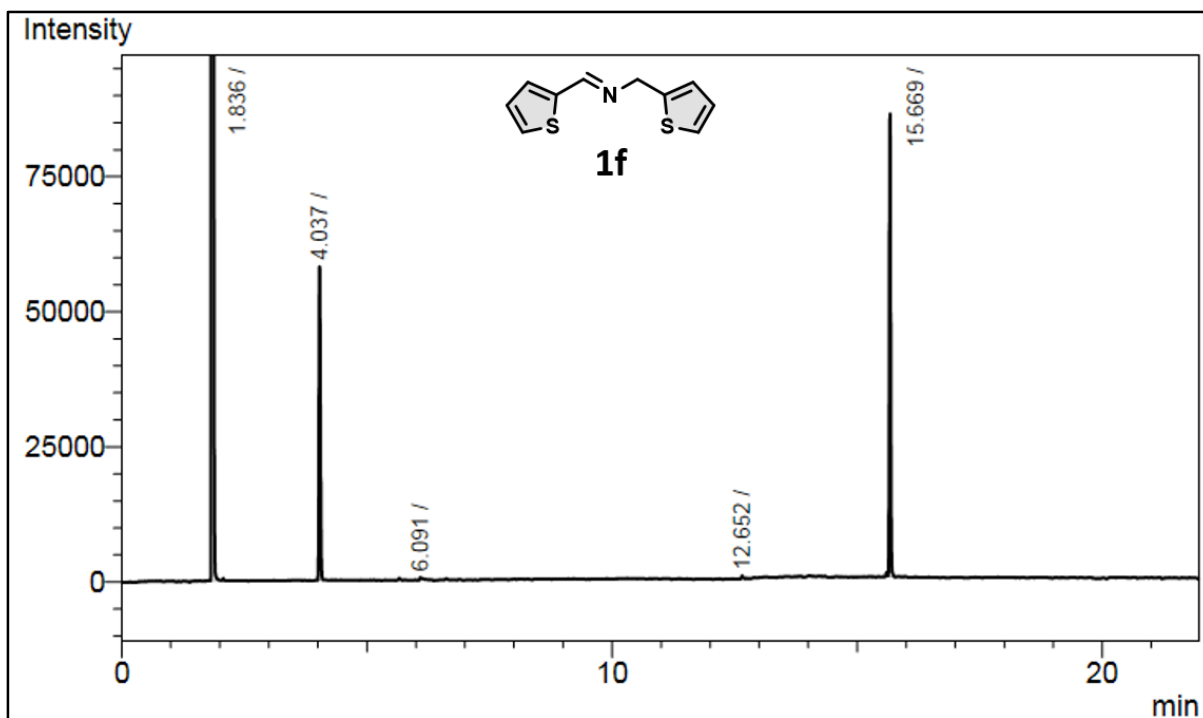

**Figure S12** GC chromatogram of 1f reaction mixture. (Rt. of ACN is 1.836 min & bromobenzene is 4.037 min)

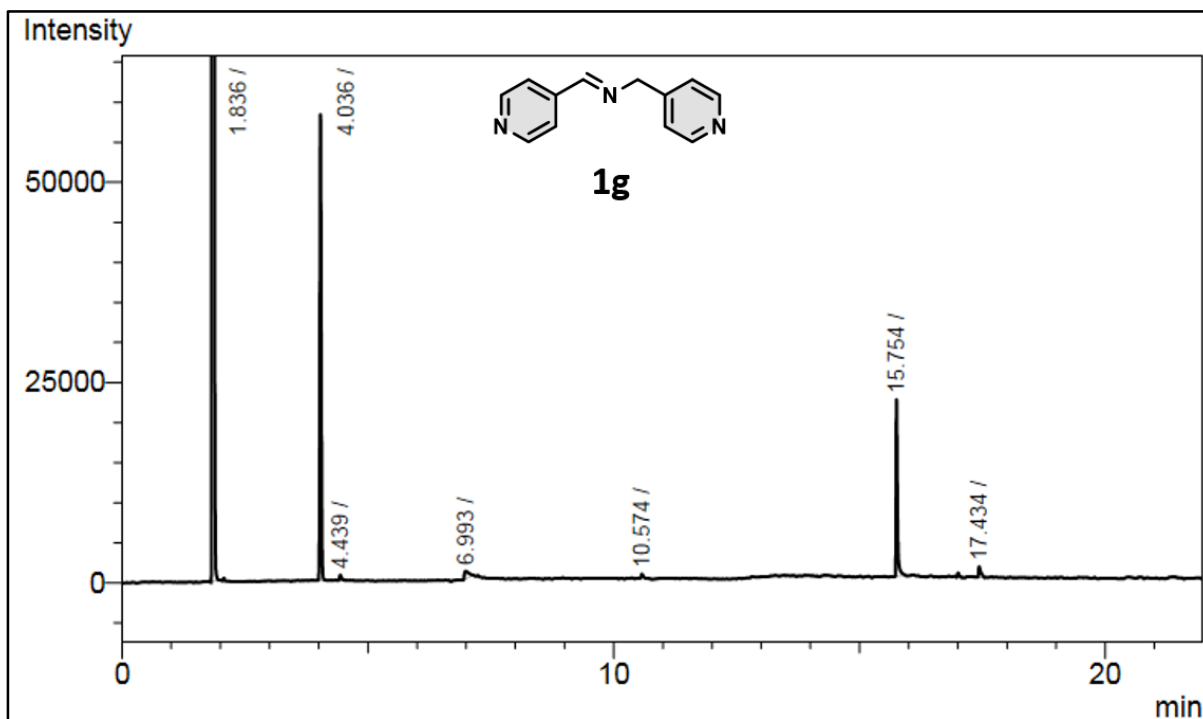

**Figure S13** GC chromatogram of 1g reaction mixture. (Rt. of ACN is 1.836 min & bromobenzene is 4.036 min)

$^1\text{H}$  NMR (400 MHz,  $\text{CDCl}_3$ )

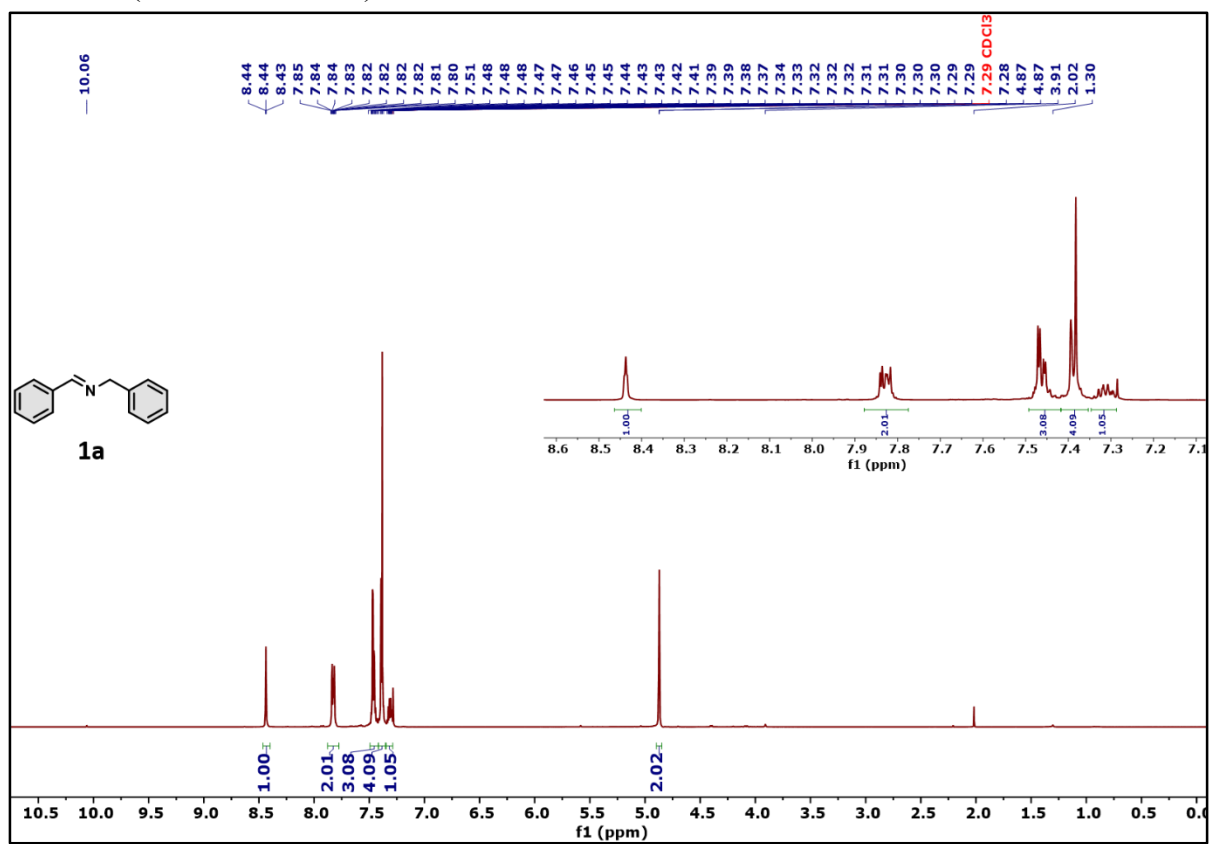

Figure S14  $^1\text{H}$  NMR spectra of **1a** reaction mixture.

$^{13}\text{C}$  NMR (101 MHz,  $\text{CDCl}_3$ )

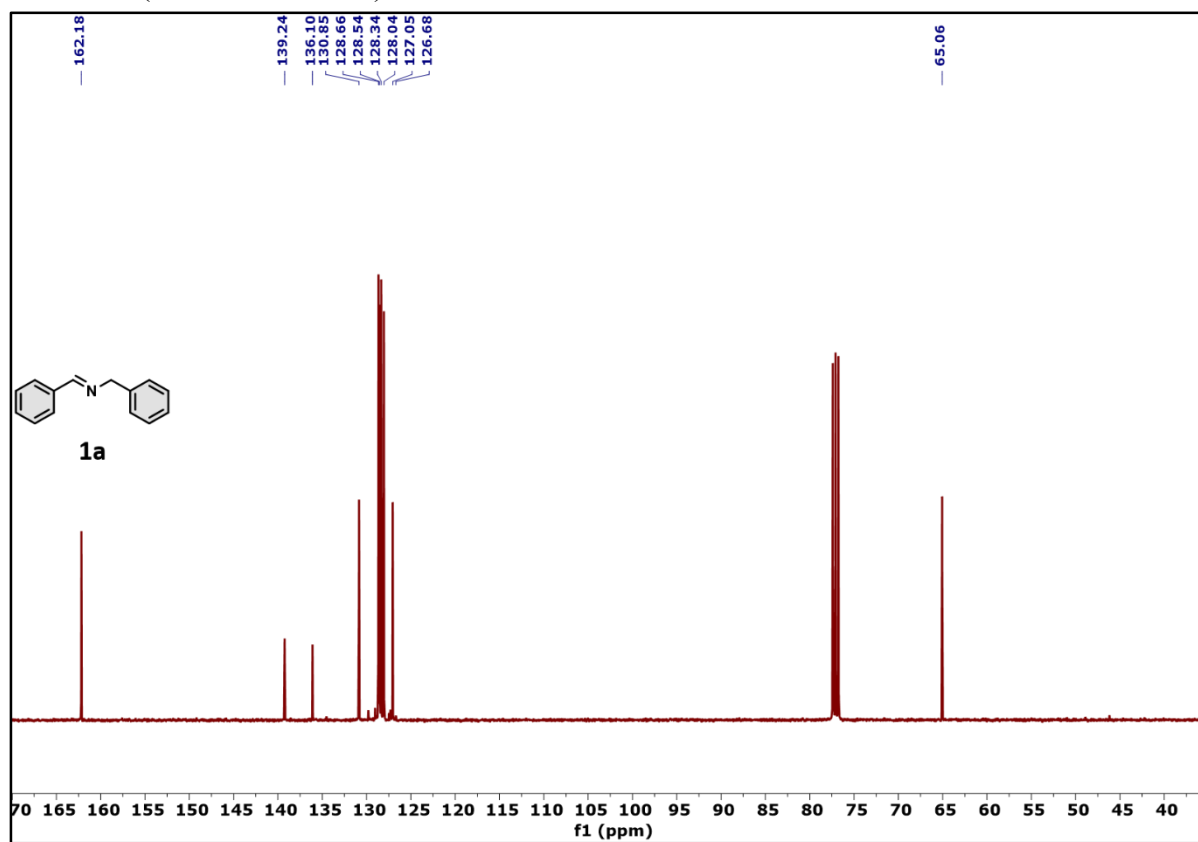

Figure S15  $^{13}\text{C}$  NMR spectra of **1a** reaction mixture.

$^1\text{H}$  NMR (400 MHz,  $\text{CDCl}_3$ )

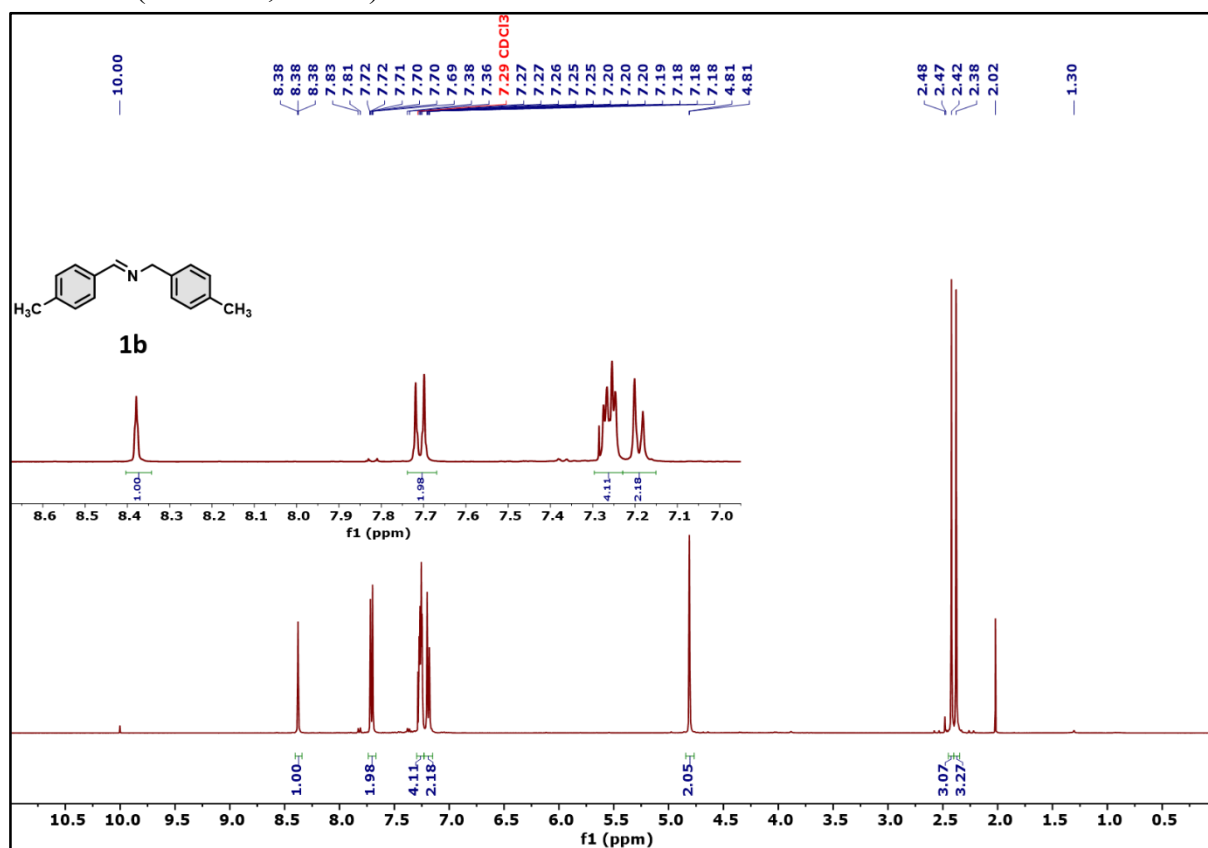

Figure S16  $^1\text{H}$  NMR spectra of **1b** reaction mixture.

$^{13}\text{C}$  NMR (101 MHz,  $\text{CDCl}_3$ )

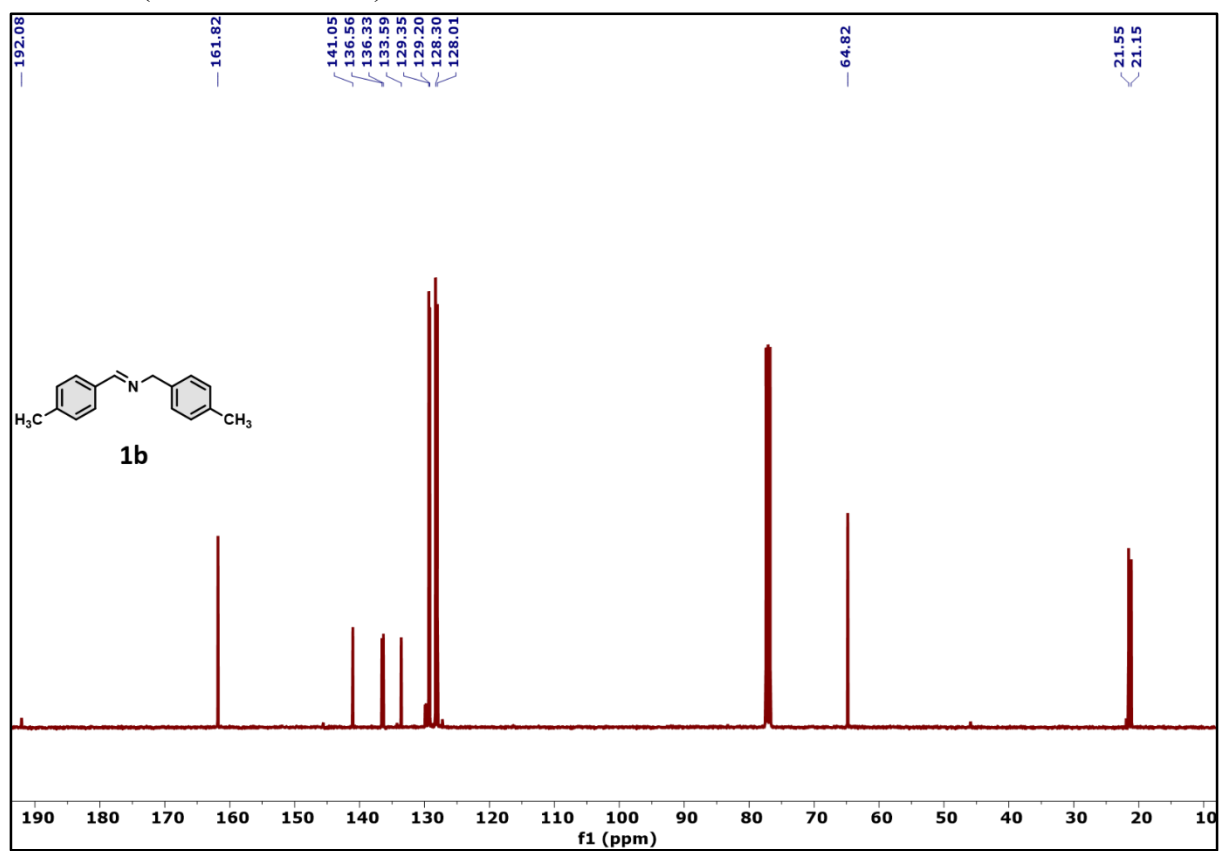

Figure S17  $^{13}\text{C}$  NMR spectra of **1b** reaction mixture.



$^1\text{H}$  NMR (400 MHz,  $\text{CDCl}_3$ )

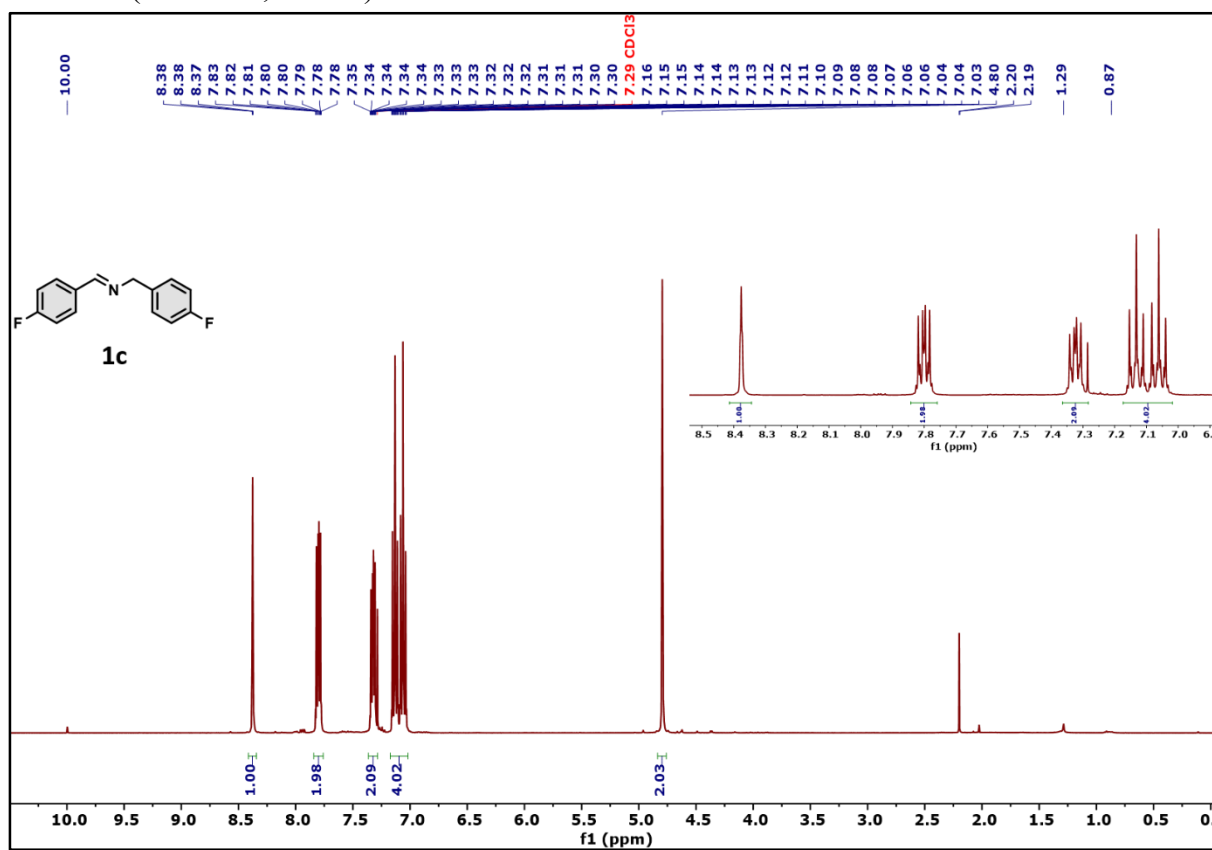

Figure S18  $^1\text{H}$  NMR spectra of **1c** reaction mixture.

$^{13}\text{C}$  NMR (101 MHz,  $\text{CDCl}_3$ )

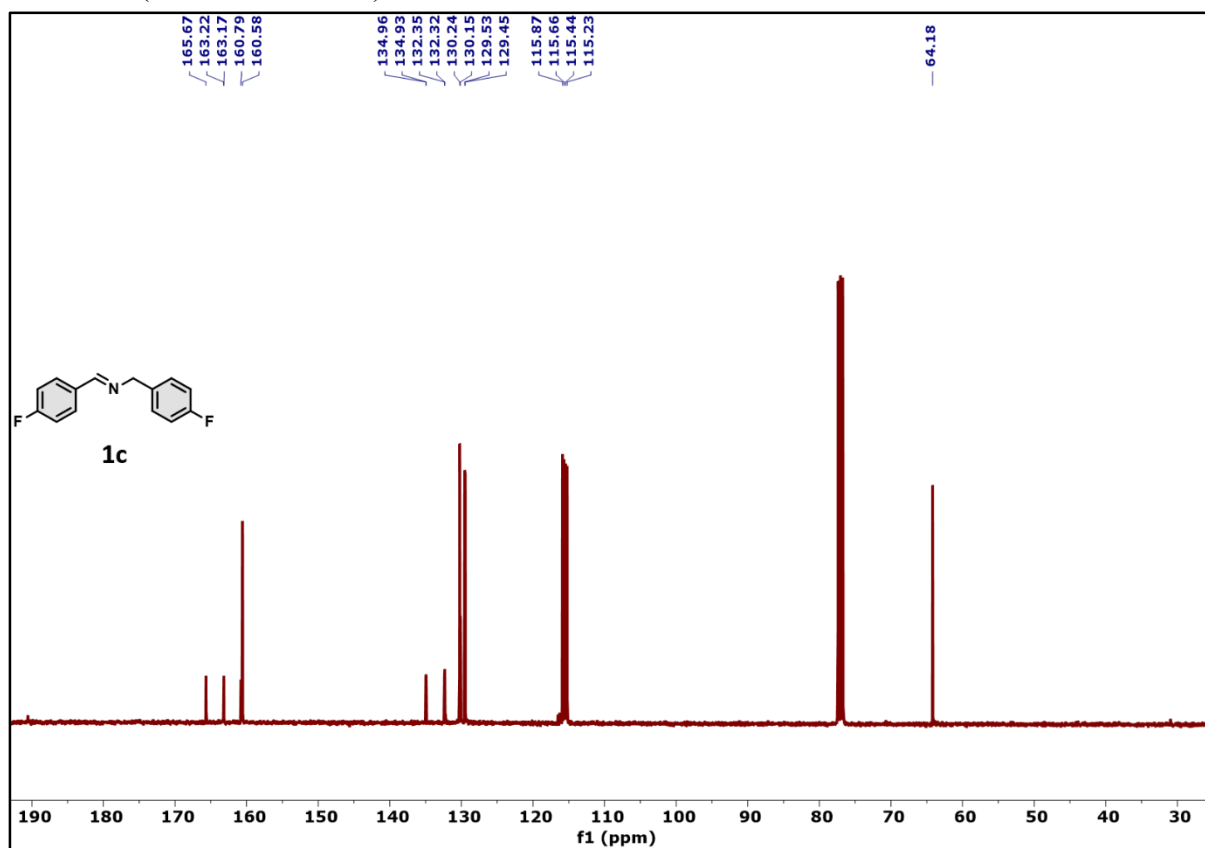

Figure S19  $^{13}\text{C}$  NMR spectra of **1c** reaction mixture.

$^1\text{H}$  NMR (400 MHz,  $\text{CDCl}_3$ )

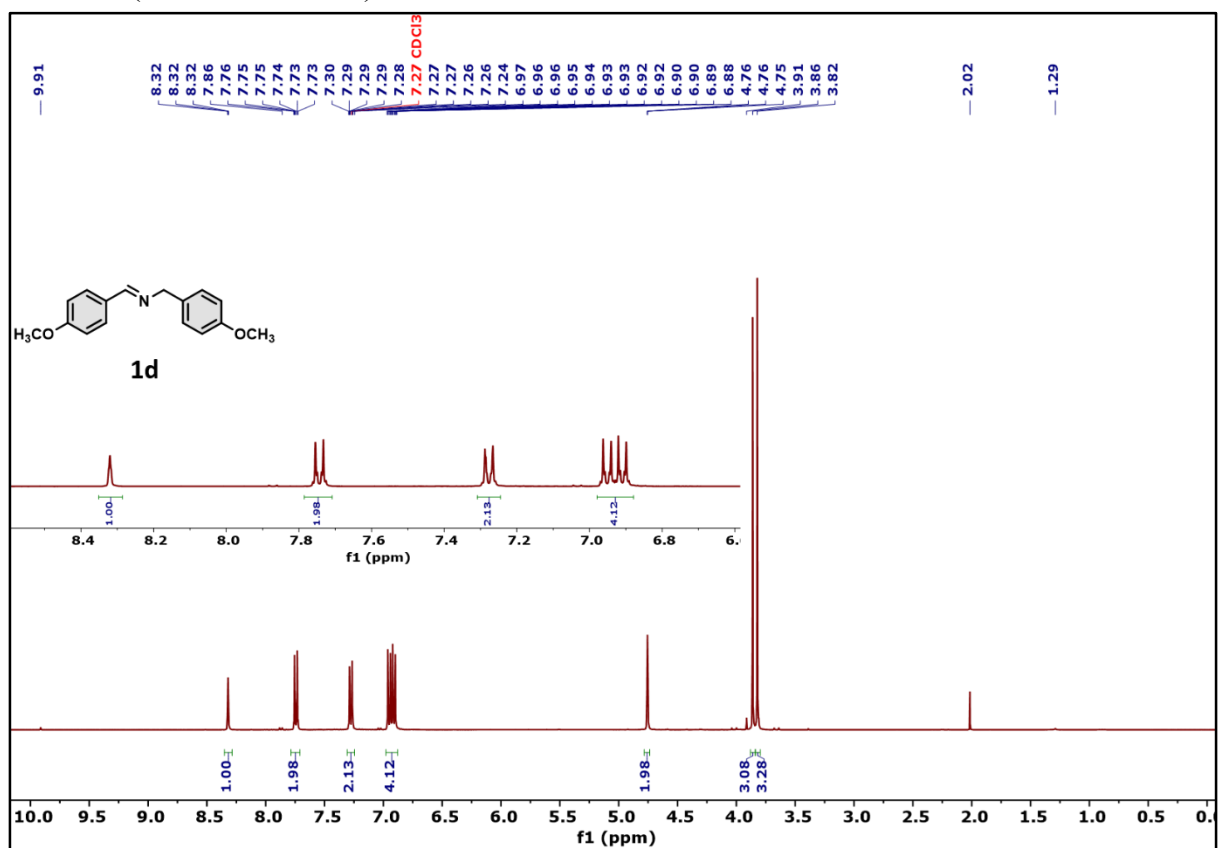

Figure S20  $^1\text{H}$  NMR spectra of **1d** reaction mixture.

$^{13}\text{C}$  NMR (101 MHz,  $\text{CDCl}_3$ )

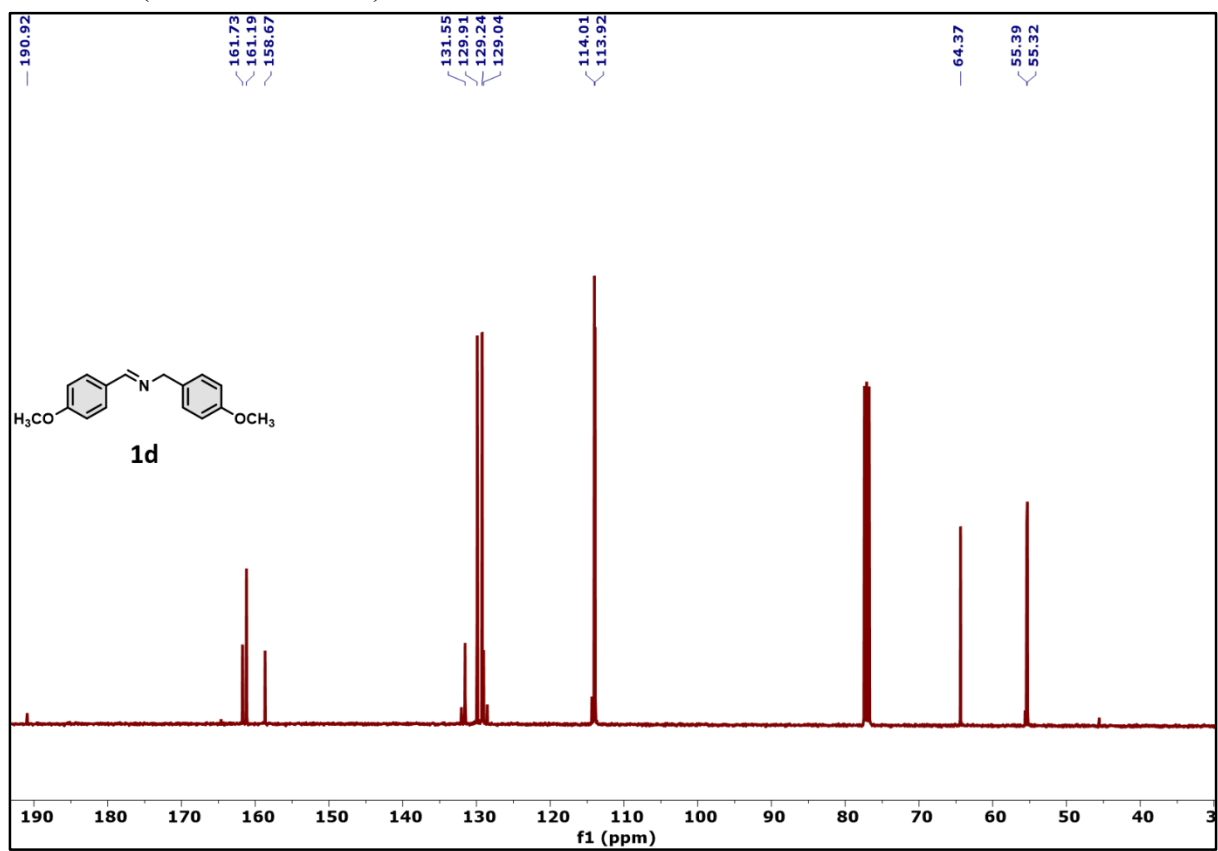

Figure S21  $^{13}\text{C}$  NMR spectra of **1d** reaction mixture.

$^1\text{H}$  NMR (400 MHz,  $\text{CDCl}_3$ )

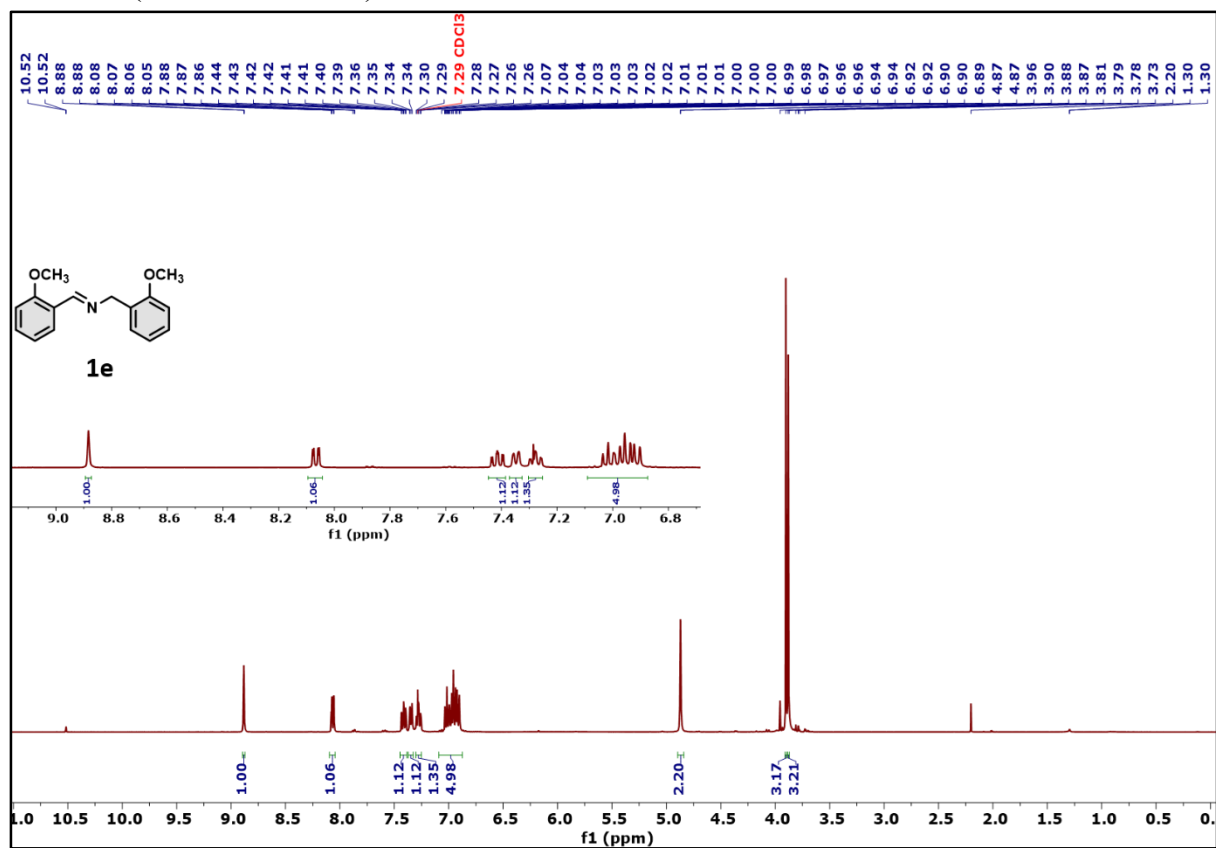

Figure S22  $^1\text{H}$  NMR spectra of **1e** reaction mixture.

$^{13}\text{C}$  NMR (101 MHz,  $\text{CDCl}_3$ )

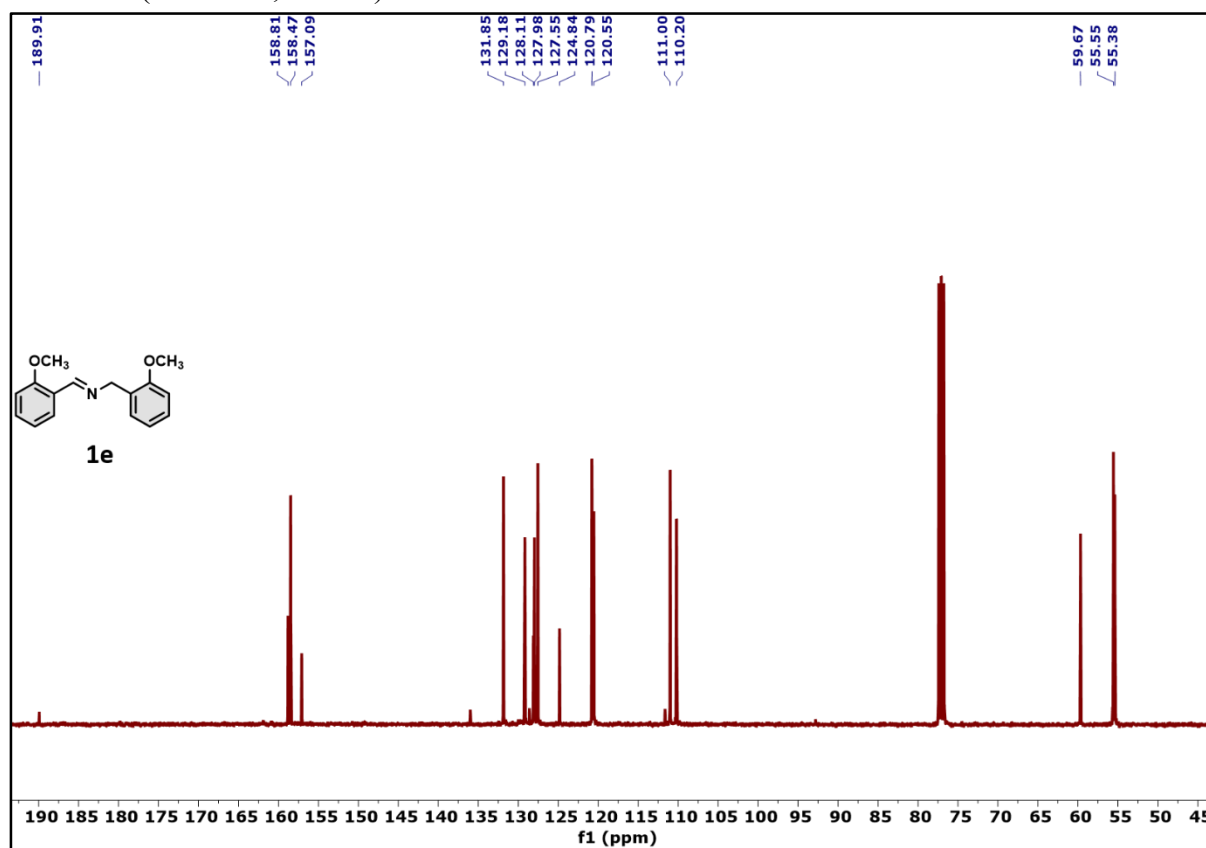

Figure S23  $^{13}\text{C}$  NMR spectra of **1e** reaction mixture.

$^1\text{H}$  NMR (400 MHz, DMSO- $d_6$ )

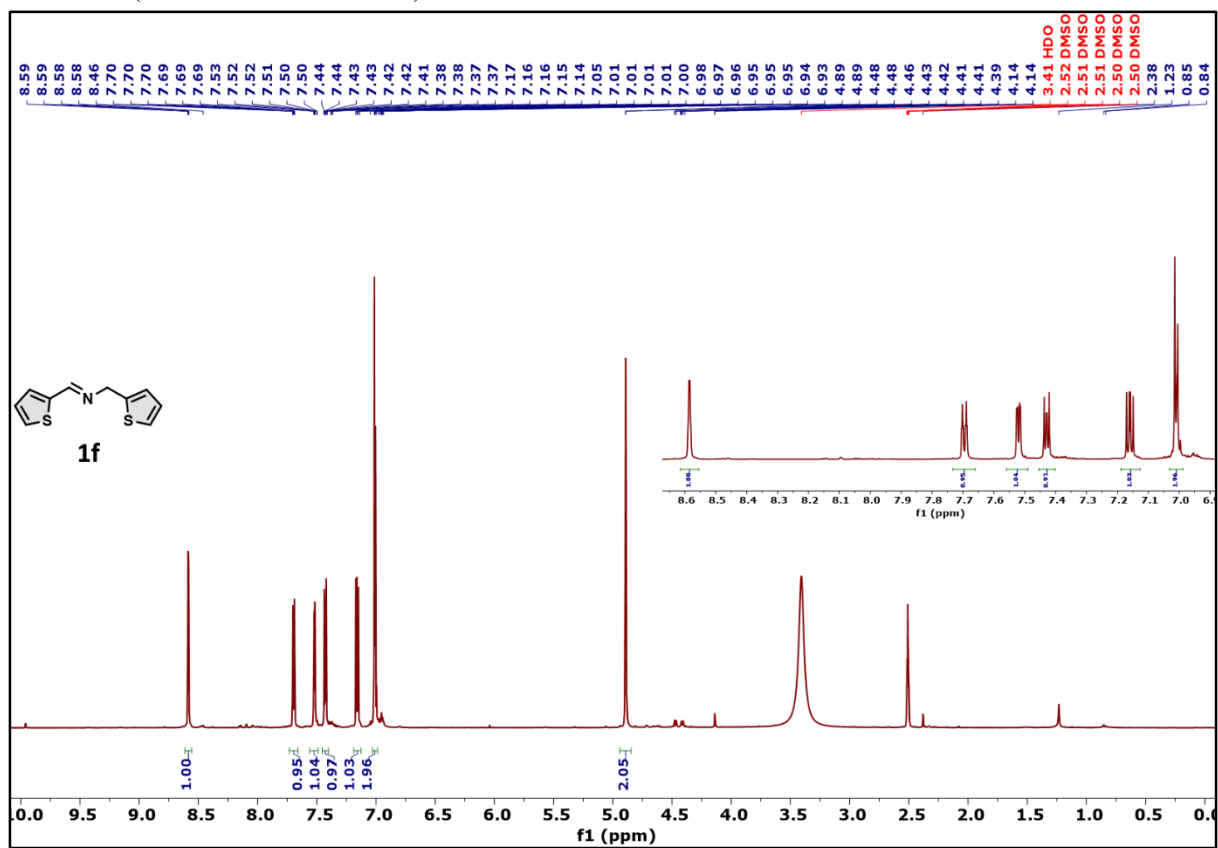

Figure S24  $^1\text{H}$  NMR spectra of **1f** reaction mixture.

$^{13}\text{C}$  NMR (101 MHz, DMSO- $d_6$ )

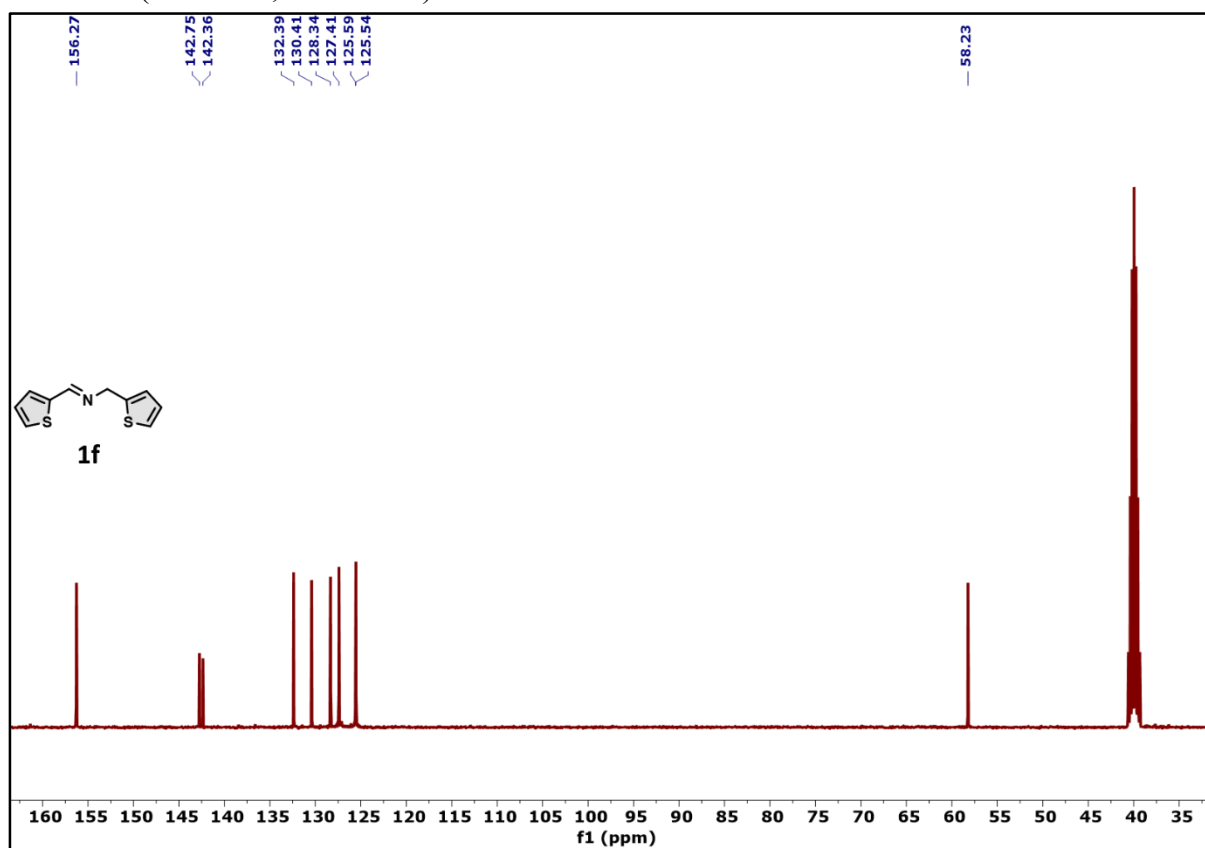

Figure S25  $^{13}\text{C}$  NMR spectra of 1f reaction mixture.



MS Zoomed Spectrum

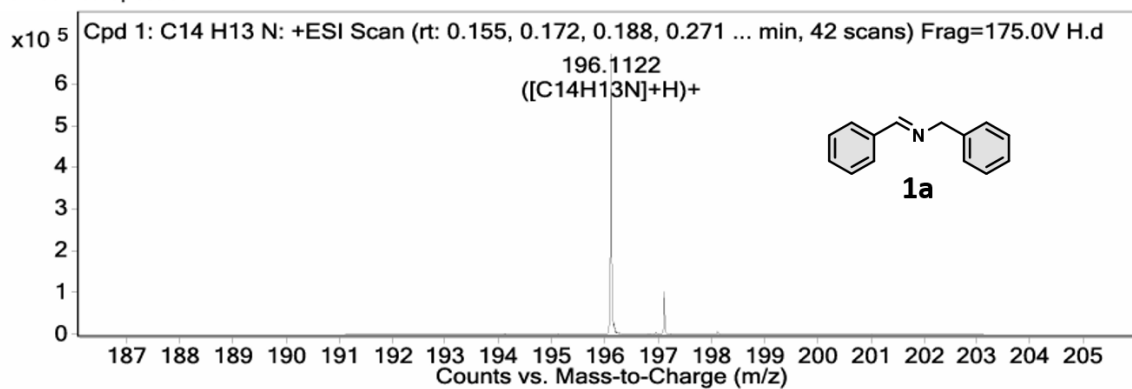

**MS Spectrum Peak List**

| m/z      | Calc m/z | Diff(ppm) | z | Abund     | Formula                           | Ion                |
|----------|----------|-----------|---|-----------|-----------------------------------|--------------------|
| 196.1122 | 196.1121 | -0.54     | 1 | 682509.31 | C <sub>14</sub> H <sub>13</sub> N | (M+H) <sup>+</sup> |
| 197.1154 | 197.1153 | -0.6      | 1 | 103432.64 | C <sub>14</sub> H <sub>13</sub> N | (M+H) <sup>+</sup> |
| 198.1189 | 198.1185 | -1.65     | 1 | 8121.99   | C <sub>14</sub> H <sub>13</sub> N | (M+H) <sup>+</sup> |

Figure S26 HRMS data for 1a

MS Zoomed Spectrum

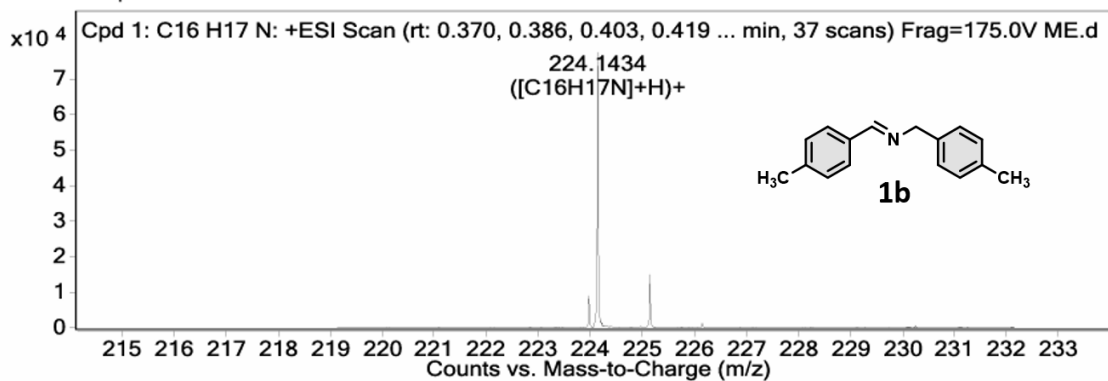

**MS Spectrum Peak List**

| m/z      | Calc m/z | Diff(ppm) | z | Abund    | Formula                           | Ion                |
|----------|----------|-----------|---|----------|-----------------------------------|--------------------|
| 224.1434 | 224.1434 | 0.06      | 1 | 81855.77 | C <sub>16</sub> H <sub>17</sub> N | (M+H) <sup>+</sup> |
| 225.1466 | 225.1466 | 0.25      | 1 | 15177.65 | C <sub>16</sub> H <sub>17</sub> N | (M+H) <sup>+</sup> |
| 226.1498 | 226.1499 | 0.53      | 1 | 1330.11  | C <sub>16</sub> H <sub>17</sub> N | (M+H) <sup>+</sup> |
| 227.1467 | 227.1531 | 28.44     | 1 | 74.71    | C <sub>16</sub> H <sub>17</sub> N | (M+H) <sup>+</sup> |

Figure S27 HRMS data for 1b

MS Zoomed Spectrum

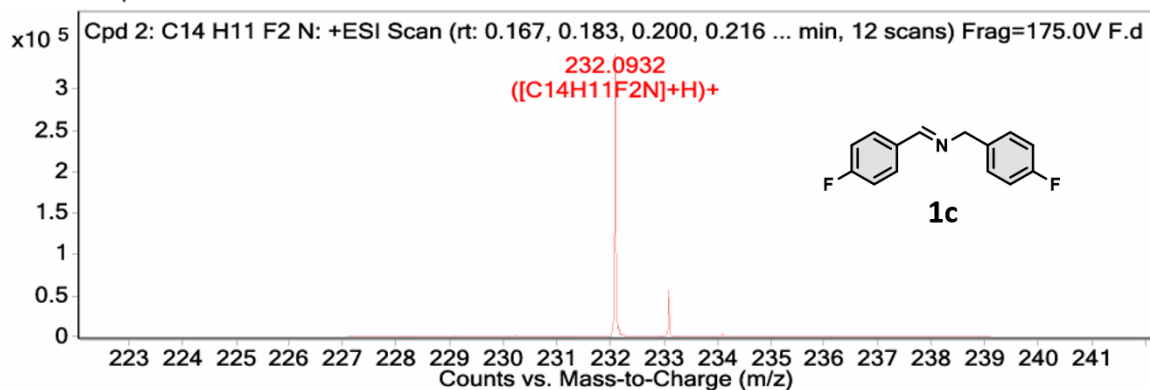

MS Spectrum Peak List

| <i>m/z</i> | <i>Calc m/z</i> | Diff(ppm) | <i>z</i> | Abund     | Formula                                          | Ion                |
|------------|-----------------|-----------|----------|-----------|--------------------------------------------------|--------------------|
| 232.0932   | 232.0932        | 0.21      | 1        | 357666.53 | C <sub>14</sub> H <sub>11</sub> F <sub>2</sub> N | (M+H) <sup>+</sup> |
| 233.0964   | 233.0965        | 0.19      | 1        | 56962.28  | C <sub>14</sub> H <sub>11</sub> F <sub>2</sub> N | (M+H) <sup>+</sup> |
| 234.0995   | 234.0997        | 0.97      | 1        | 4272.5    | C <sub>14</sub> H <sub>11</sub> F <sub>2</sub> N | (M+H) <sup>+</sup> |

Figure S28 HRMS data for 1c

MS Zoomed Spectrum

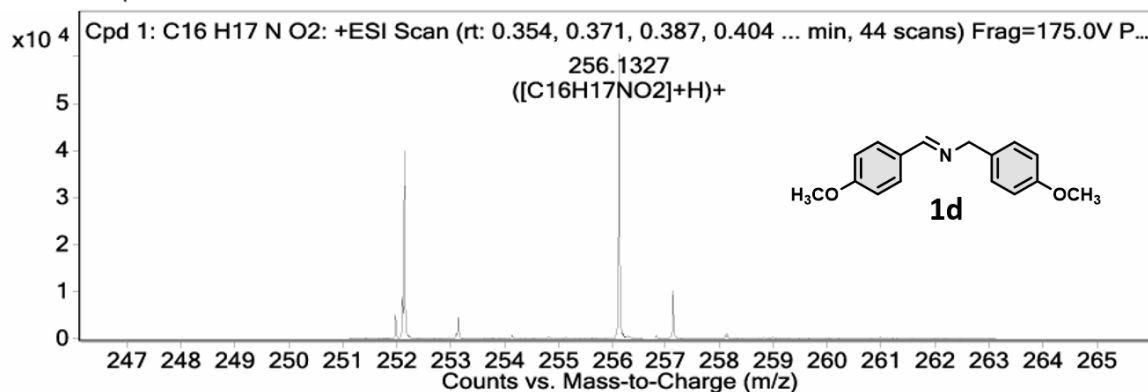

MS Spectrum Peak List

| <i>m/z</i> | <i>Calc m/z</i> | Diff(ppm) | <i>z</i> | Abund    | Formula                                         | Ion                |
|------------|-----------------|-----------|----------|----------|-------------------------------------------------|--------------------|
| 256.1327   | 256.1332        | 2.04      | 1        | 61343.25 | C <sub>16</sub> H <sub>17</sub> NO <sub>2</sub> | (M+H) <sup>+</sup> |
| 257.1359   | 257.1365        | 2.04      | 1        | 10667.24 | C <sub>16</sub> H <sub>17</sub> NO <sub>2</sub> | (M+H) <sup>+</sup> |
| 258.1379   | 258.1392        | 5.26      | 1        | 1220.29  | C <sub>16</sub> H <sub>17</sub> NO <sub>2</sub> | (M+H) <sup>+</sup> |

Figure S29 HRMS data for 1d

## MS Zoomed Spectrum

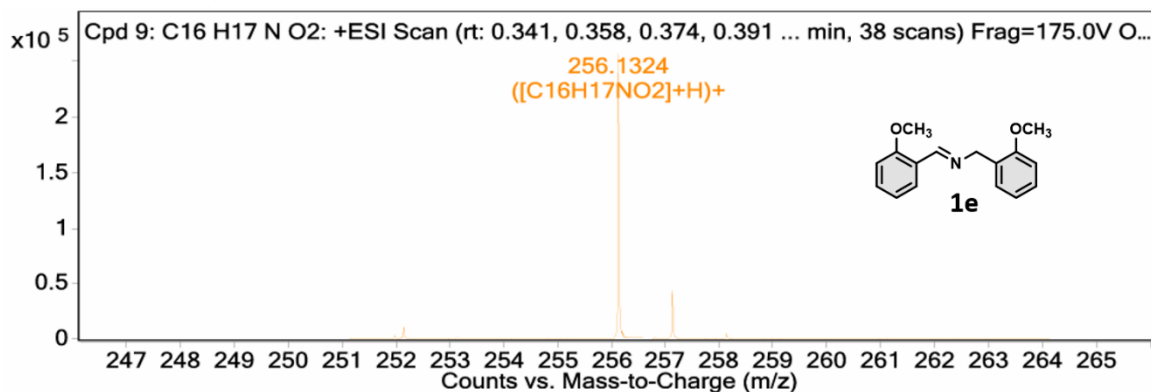

## MS Spectrum Peak List

| m/z      | Calc m/z | Diff(ppm) | z | Abund     | Formula                                         | Ion                |
|----------|----------|-----------|---|-----------|-------------------------------------------------|--------------------|
| 256.1324 | 256.1332 | 3.15      | 1 | 258455.63 | C <sub>16</sub> H <sub>17</sub> NO <sub>2</sub> | (M+H) <sup>+</sup> |
| 257.1355 | 257.1365 | 3.92      | 1 | 44576.36  | C <sub>16</sub> H <sub>17</sub> NO <sub>2</sub> | (M+H) <sup>+</sup> |
| 258.1384 | 258.1392 | 3.1       | 1 | 4896.12   | C <sub>16</sub> H <sub>17</sub> NO <sub>2</sub> | (M+H) <sup>+</sup> |
| 259.1409 | 259.1419 | 3.86      | 1 | 429.37    | C <sub>16</sub> H <sub>17</sub> NO <sub>2</sub> | (M+H) <sup>+</sup> |

Figure S30 HRMS data for 1e

## MS Zoomed Spectrum

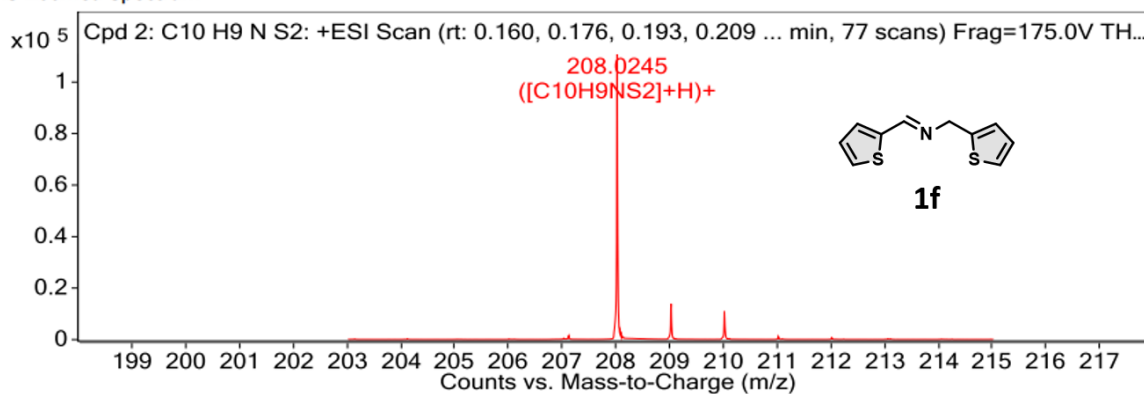

## MS Spectrum Peak List

| m/z      | Calc m/z | Diff(ppm) | z | Abund     | Formula                                        | Ion                |
|----------|----------|-----------|---|-----------|------------------------------------------------|--------------------|
| 208.0245 | 208.0249 | 1.79      | 1 | 112613.94 | C <sub>10</sub> H <sub>9</sub> NS <sub>2</sub> | (M+H) <sup>+</sup> |
| 209.0273 | 209.0276 | 1.47      | 1 | 14167.99  | C <sub>10</sub> H <sub>9</sub> NS <sub>2</sub> | (M+H) <sup>+</sup> |
| 210.0207 | 210.0215 | 3.56      | 1 | 11045.97  | C <sub>10</sub> H <sub>9</sub> NS <sub>2</sub> | (M+H) <sup>+</sup> |

Figure S31 HRMS data for 1f

## MS Zoomed Spectrum

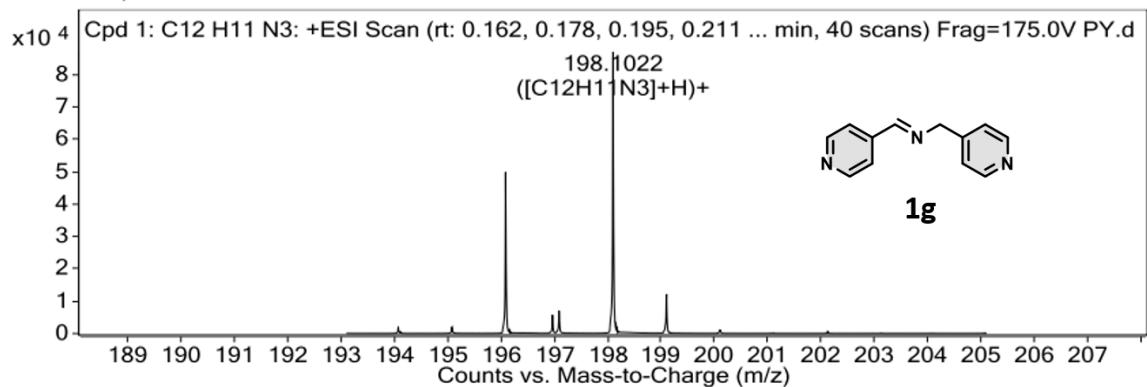

## MS Spectrum Peak List

| m/z      | Calc m/z | Diff(ppm) | z | Abund    | Formula                                        | Ion                |
|----------|----------|-----------|---|----------|------------------------------------------------|--------------------|
| 198.1022 | 198.1026 | 2.07      | 1 | 88445.86 | C <sub>12</sub> H <sub>11</sub> N <sub>3</sub> | (M+H) <sup>+</sup> |
| 199.1048 | 199.1055 | 3.22      | 1 | 12440.07 | C <sub>12</sub> H <sub>11</sub> N <sub>3</sub> | (M+H) <sup>+</sup> |
| 200.1113 | 200.1083 | -14.69    | 1 | 1271.74  | C <sub>12</sub> H <sub>11</sub> N <sub>3</sub> | (M+H) <sup>+</sup> |

Figure S32 HRMS data for 1g

## MS Zoomed Spectrum

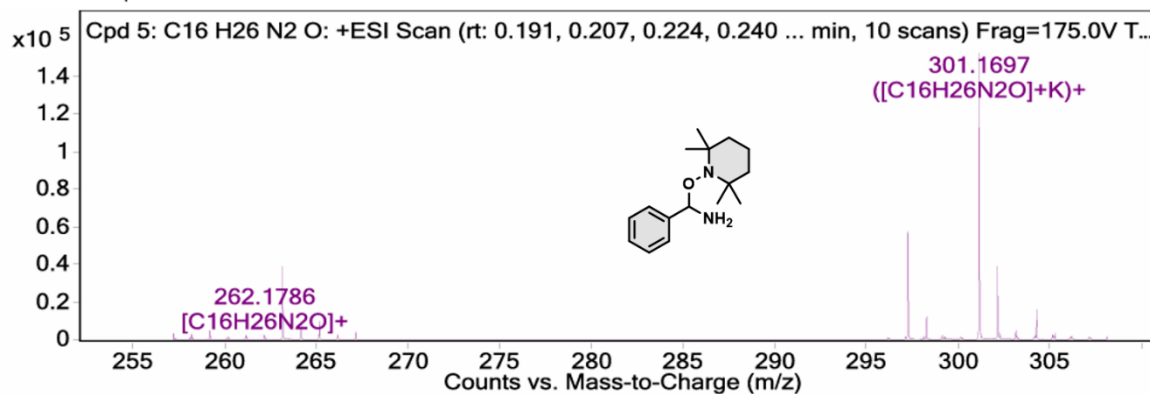

## MS Spectrum Peak List

| m/z      | Calc m/z | Diff(ppm) | z | Abund     | Formula                                          | Ion                |
|----------|----------|-----------|---|-----------|--------------------------------------------------|--------------------|
| 262.1786 | 262.204  | 96.93     | 1 | 1702.87   | C <sub>16</sub> H <sub>26</sub> N <sub>2</sub> O | M <sup>+</sup>     |
| 301.1697 | 301.1677 | -6.88     | 1 | 157437.94 | C <sub>16</sub> H <sub>26</sub> N <sub>2</sub> O | (M+K) <sup>+</sup> |
| 302.1726 | 302.1708 | -6        | 1 | 39458.26  | C <sub>16</sub> H <sub>26</sub> N <sub>2</sub> O | (M+K) <sup>+</sup> |
| 303.1729 | 303.1674 | -18.3     | 1 | 5133.03   | C <sub>16</sub> H <sub>26</sub> N <sub>2</sub> O | (M+K) <sup>+</sup> |

Figure S33 HRMS data for BNA-TEMPO adduct.

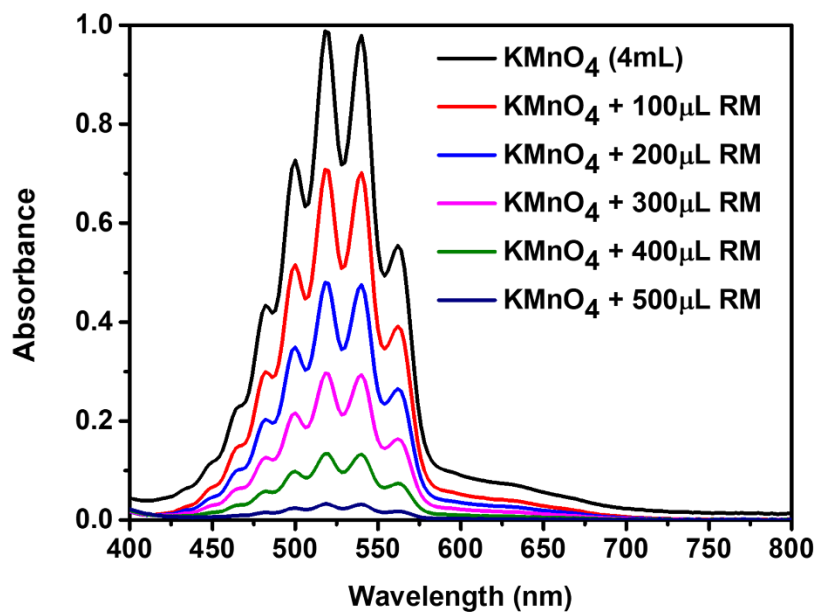

**Figure S34** Detection of  $\text{H}_2\text{O}_2$  in the reaction mixture after completion of the reaction.

RM = Reaction Mixture

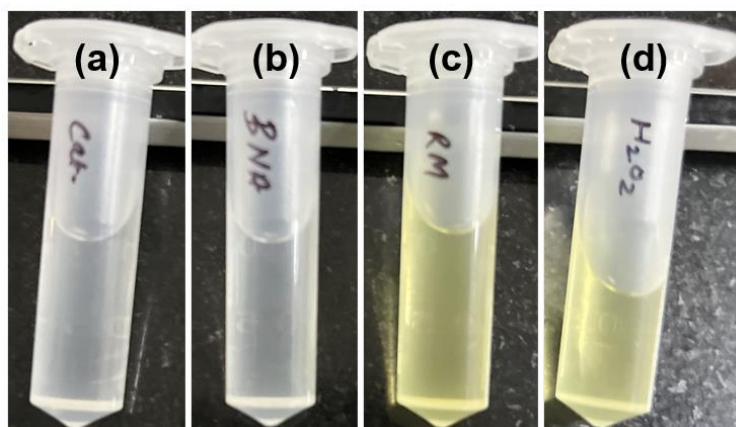

**Figure S35** Detection of  $\text{H}_2\text{O}_2$  in the photocatalytic reaction mixture by calorimetric analysis with KI solution. (a) KI(0.2M) + Ph-BT-Ph only (b) KI(0.2M) + BNA only (c) KI(0.2M) + RM (d) KI(0.2M) +  $\text{H}_2\text{O}_2$  only. Yellow color appearance in photocatalytic reaction mixture after addition of KI solution indicating presence of  $\text{H}_2\text{O}_2$ . RM = Reaction Mixture.

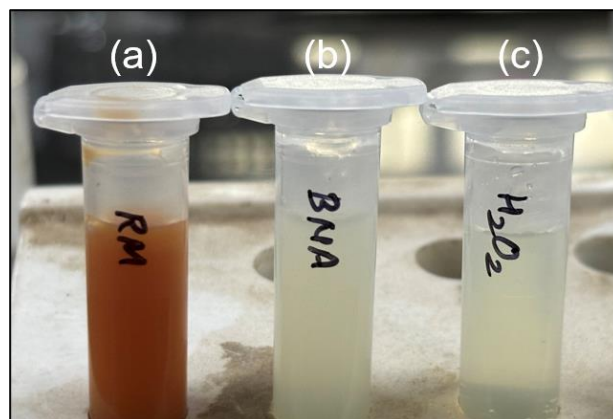

**Figure S36** Nessler reagent (NR) test for ammonia detection (a) Aqueous layer of RM + NR (b) Aqueous layer of BNA + NR (c) Aqueous H<sub>2</sub>O<sub>2</sub> + NR. Brown color appearance in aqueous layer of RM is indicating presence of NH<sub>3</sub> in photocatalytic reaction mixture. RM = Reaction Mixture.

### Long-term Stability Test

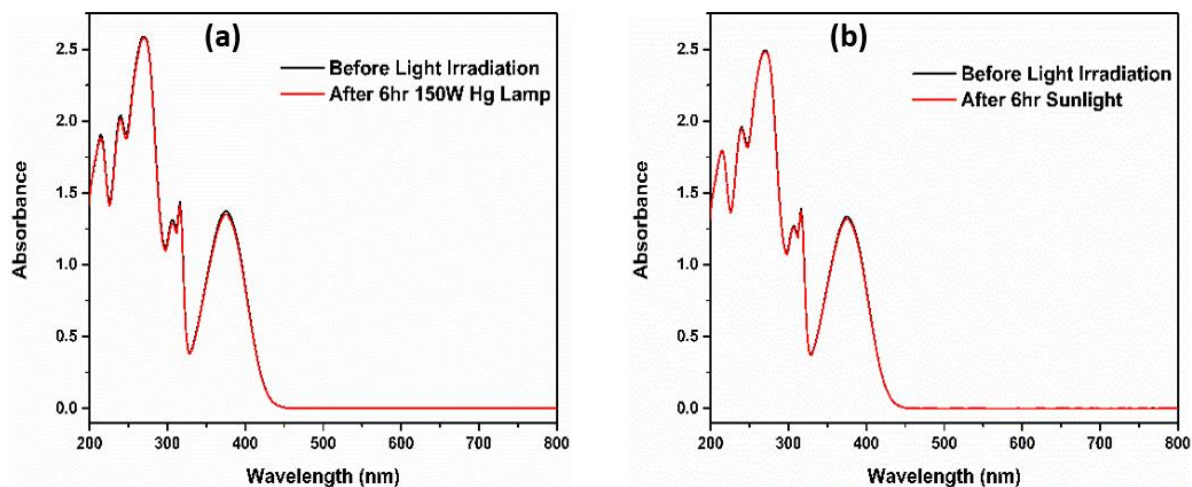

**Figure S37** Long-term stability of the photocatalyst under (a) 150W Hg Lamp (b) Natural sunlight.

## Reusability Study

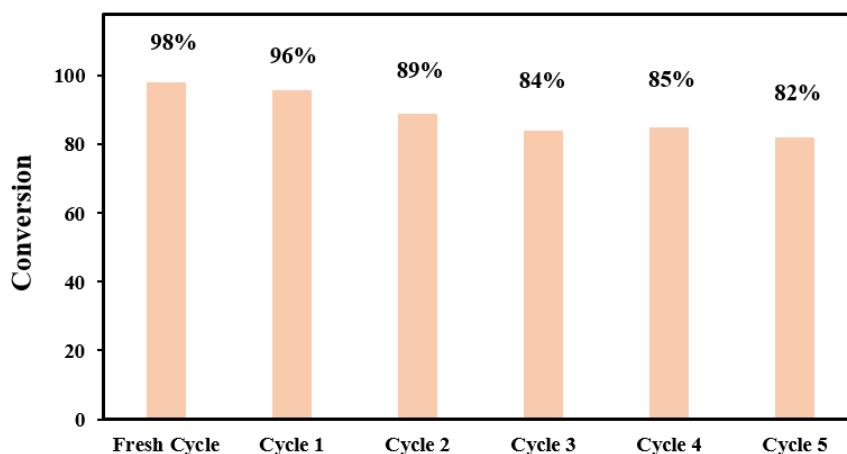

**Figure S38** Reusability study of photocatalyst Ph-BT-Ph for the oxidative coupling of amines to imines for five consecutive cycle after fresh catalytic cycle performed under 250W Visible light lamp.

## Details from DFT studies

The relative energetic alignment of the molecular orbitals of BNA, Ph-BT-Ph (singlet, triplet) and Oxygen molecule in triplet and singlet states are shown in Figure S37. Below we discuss the possible reactions occurring both in the electron transfer and energy transfer pathways as obtained from DFT.

### Formation of BNA—[Ph-BT-Ph] complex (electron-transfer)

As proposed in the scheme shown in Figure 6, we consider that BNA molecule interacts with Ph-BT-Ph to form a loosely bound complex **BNA—[Ph-BT-Ph]**. We investigated the binding of BNA and Ph-BT-Ph using DFT and various structures were explored with BNA interactions at different configurations. The most stable structure with Ph-BT-Ph in ground state shows that the interaction of BNA and Ph-BT-Ph in singlet ground state is attractive with a negative binding energy, but the energy is small.

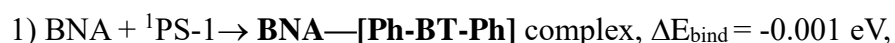

It is however more likely that, the photocatalyst Ph-BT-Ph molecule exists in the excited state during interaction with BNA as the reaction occurs in presence of sunlight, therefore we studied the complex formation with singlet excited state and triplet of Ph-BT-Ph as below. We optimized the structure of Ph-BT-Ph in singlet excited state S1, which was a stable structure and estimated the binding energy for complex formation with BNA. The binding energy is negative, and binding is stronger compared to the interaction with the ground state given above.

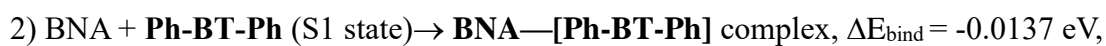

The binding energy of BNA with triplet Ph-BT-Ph was also calculated:

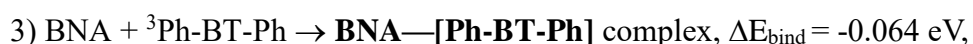

Considering the above three cases we conclude that formation of BNA complex with the photocatalyst is more probable when Ph-BT-Ph is in excited state. The **BNA—[Ph-BT-Ph]** complex thus formed can pave the way of electron transfer from BNA to Ph-BT-Ph in the excited state, which acts as a mediator for electron transfer.

The changes in the bond distances for the ground state (GS) and the excited state (ES, S1) of Ph-BT-Ph have been tabulated in Table S2. The structure of Ph-BT-Ph is not fully planar as with the central ring out-of-plane, as shown in Figure S37. In excited state S1, not only the N-S and C-C bond-distances of the central portion changed, but the dihedral angles also changed, which is an indicator of planarity (shown in Table S2).

We then considered the interaction of **BNA—[Ph-BT-Ph]** complex with ROS, singlet oxygen ( ${}^1\text{O}_2$ ) to form BNA-OOH while the photocatalyst Ph-BT-Ph is regenerated. The reaction is thermodynamically favourable with a negative free energy as shown here. The free energies of other reactions are also listed below.

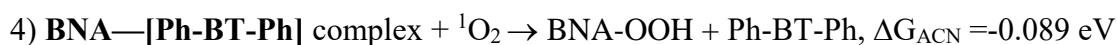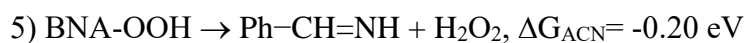

Further reaction-steps with BNA to produce  $\text{NH}_3$  and BNI in two consecutive steps are shown which have slightly negative free energy.

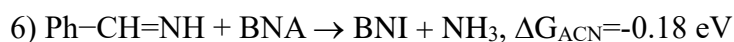

#### **Formation of [Ph-BT-Ph]—O<sub>2</sub> complex (energy-transfer)**

The calculated electronic energy difference between the Ph-BT-Ph in singlet, ground state and excited, triplet state is 1.85 eV which is already shown in Figure 7d.



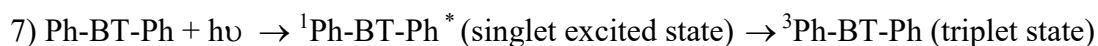

We now consider below the oxygen binding with triplet Ph-BT-Ph to form complex **[Ph-BT-Ph]—O<sub>2</sub>**, which produces ROS, <sup>1</sup>O<sub>2</sub> and the photocatalyst is regenerated. Then ROS can again react with BNA—[Ph-BT-Ph] complex, and reaction 4, 5 and 6 can take place forming final products within the reaction mixture. The oxygen binding energy to the triplet photocatalyst is negative.

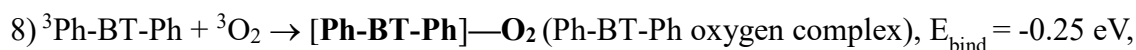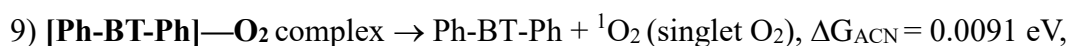

The overall reaction considering the electron transfer and energy transfer pathways is the interaction of the two complexes, namely the **BNA—[Ph-BT-Ph]** and **[Ph-BT-Ph]—O<sub>2</sub>** in excess BNA and in presence of sunlight forms BNI, H<sub>2</sub>O<sub>2</sub> and NH<sub>3</sub> with two molecules of catalyst being regenerated.

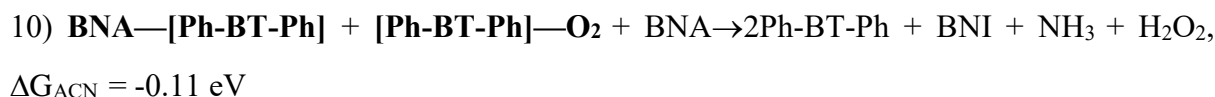

We also studied the optimized structure of excited state S6 as the TD-DFT spectrum shows the highest oscillator strength for this transition.

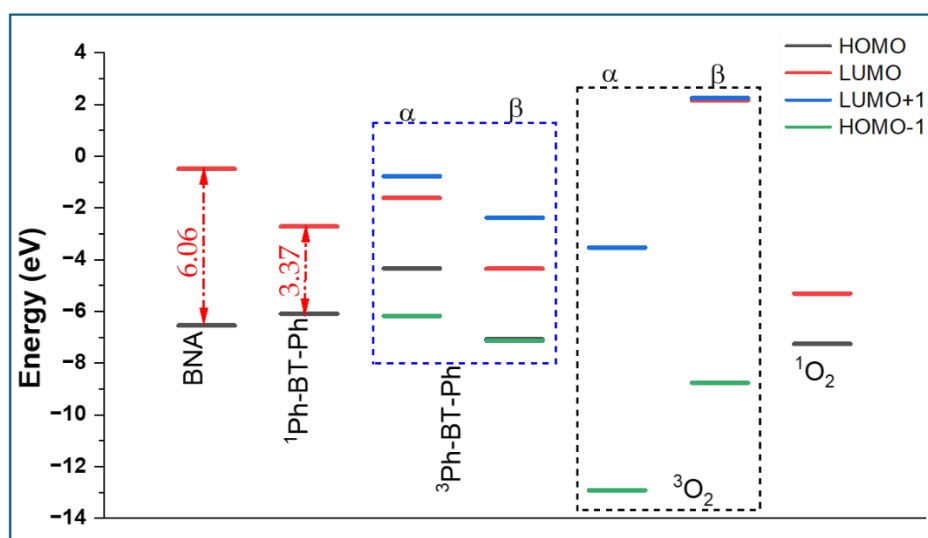

**Figure S39** The relative energetic alignment of the molecular orbitals of BNA, Ph-BT-Ph (singlet, triplet) and Oxygen molecule in triplet and singlet states.

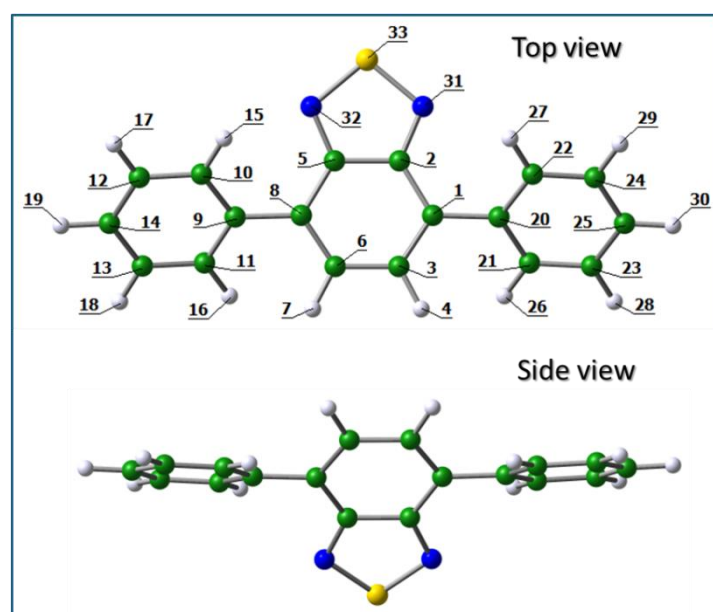

**Figure S40** Structure of Ph-BT-Ph shown with atom numbers marked. The overall planarity of the structure is clear in the top and side views.

**Table S2** Few important bond distances in Å are tabulated in ground and excited states, S1 and S6. Two dihedral angles are given to show the changes in planarity in the ground and excited states.

| <b>Bond-distance/<br/>Dihedral angle</b> | <b>Ground<br/>state<br/>GS</b> | <b>Excited<br/>state<br/>ES, S1</b> | <b>Excited<br/>state<br/>ES, S6</b> |
|------------------------------------------|--------------------------------|-------------------------------------|-------------------------------------|
| 33-31                                    | 1.64                           | 1.68                                | 1.67                                |
| 33-32                                    | 1.64                           | 1.68                                | 1.67                                |
| 32-5                                     | 1.33                           | 1.34                                | 1.35                                |
| 31-2                                     | 1.33                           | 1.34                                | 1.35                                |
| 5-2                                      | 1.46                           | 1.45                                | 1.51                                |
| 5-8                                      | 1.43                           | 1.44                                | 1.42                                |
| 2-1                                      | 1.43                           | 1.44                                | 1.42                                |
| 8-6                                      | 1.38                           | 1.43                                | 1.40                                |
| 1-3                                      | 1.38                           | 1.43                                | 1.40                                |
| 6-3                                      | 1.42                           | 1.37                                | 1.42                                |
| 9-8                                      | 1.48                           | 1.45                                | 1.475                               |
| 1-20                                     | 1.48                           | 1.45                                | 1.475                               |
| 2-1-20-22<br>(degree)                    | 42.4                           | 22.6                                | 36                                  |
| 5-8-9-11<br>(degree)                     | 139.1                          | 158.4                               | 145.6                               |

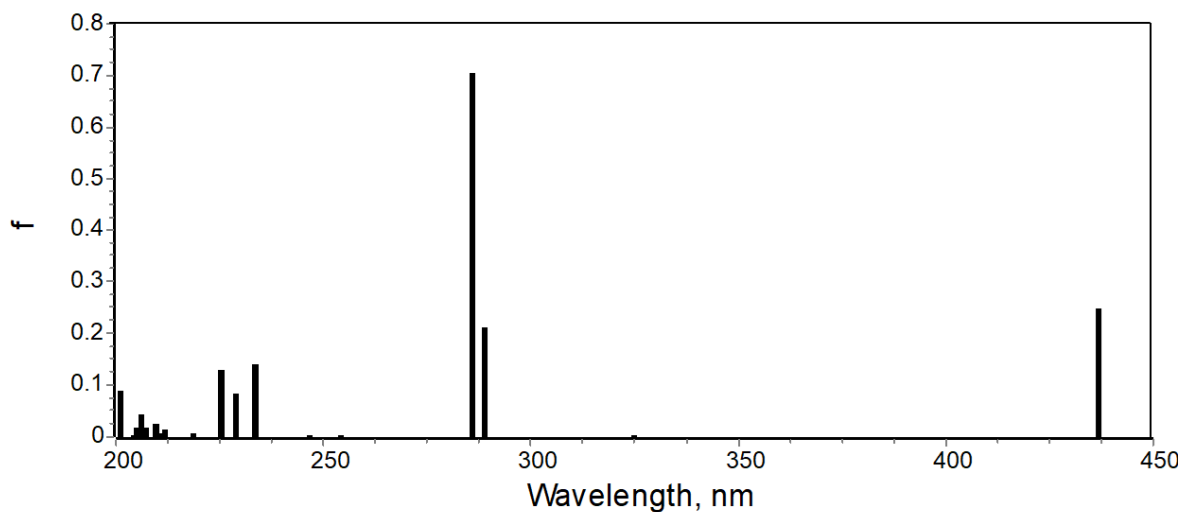

**Figure S41** Calculated electronic spectrum in acetonitrile (ACN) obtained from TD-DFT studies.

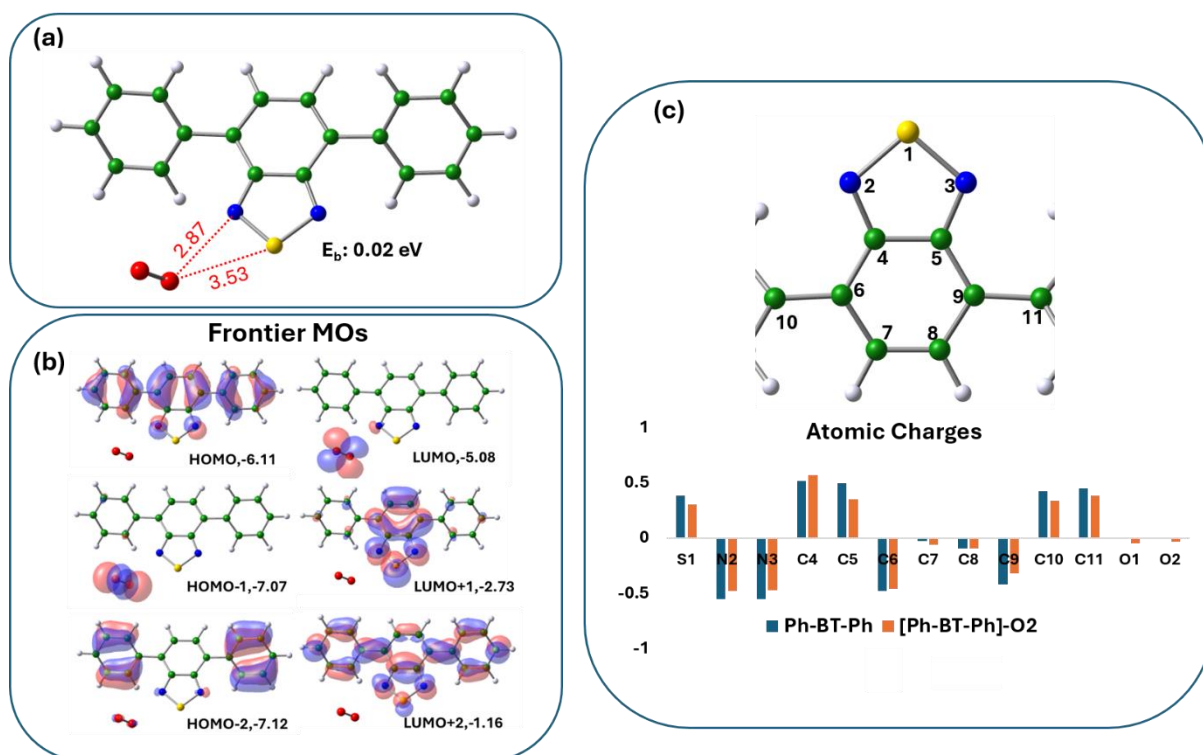

**Figure S42 (a)** The optimized structure of Ph-BT-Ph--O<sub>2</sub> complex with oxygen bound in side-on position interacting preferentially with N atoms of the benzothiadiazole ring. **(b)** Plots of frontier molecular orbitals including the HOMO and LUMO of Ph-BT-Ph--O<sub>2</sub> complex, the color codes show different signs of wavefunctions. The energies of the respective MOs in the eV are written alongside. **(c)** Bar chart showing the changes in atomic charges of Ph-BT-Ph before and after interaction with Oxygen.

## Optimized Co-ordinates for structures reported

### Ph-BT-Ph (Ground state)

B3LYP/6-311+G\*\* (SMD, solvent=acetonitrile)

|   |              |              |              |
|---|--------------|--------------|--------------|
| C | 1.469209000  | -0.514567000 | 0.071958000  |
| C | 0.728109000  | 0.701128000  | -0.114311000 |
| C | 0.711054000  | -1.654689000 | 0.224525000  |
| H | 1.212458000  | -2.602372000 | 0.383680000  |
| C | -0.728109000 | 0.701128000  | -0.114311000 |
| C | -0.711055000 | -1.654689000 | 0.224525000  |
| H | -1.212458000 | -2.602372000 | 0.383680000  |
| C | -1.469209000 | -0.514566000 | 0.071958000  |
| C | -2.951070000 | -0.551225000 | 0.089348000  |
| C | -3.701501000 | 0.423507000  | 0.767447000  |
| C | -3.637622000 | -1.594195000 | -0.554189000 |
| C | -5.092130000 | 0.350164000  | 0.806563000  |
| C | -5.028626000 | -1.662823000 | -0.517761000 |
| C | -5.762231000 | -0.691193000 | 0.163483000  |
| H | -3.195312000 | 1.231836000  | 1.279485000  |
| H | -3.079473000 | -2.346497000 | -1.099987000 |
| H | -5.652598000 | 1.107694000  | 1.343657000  |
| H | -5.538958000 | -2.472416000 | -1.028106000 |
| H | -6.845056000 | -0.743673000 | 0.191217000  |
| C | 2.951070000  | -0.551226000 | 0.089348000  |
| C | 3.637622000  | -1.594195000 | -0.554188000 |
| C | 3.701501000  | 0.423507000  | 0.767447000  |
| C | 5.028626000  | -1.662824000 | -0.517761000 |
| C | 5.092130000  | 0.350164000  | 0.806563000  |
| C | 5.762230000  | -0.691193000 | 0.163483000  |
| H | 3.079473000  | -2.346498000 | -1.099987000 |
| H | 3.195312000  | 1.231836000  | 1.279484000  |
| H | 5.538959000  | -2.472416000 | -1.028106000 |
| H | 5.652597000  | 1.107694000  | 1.343656000  |
| H | 6.845056000  | -0.743673000 | 0.191217000  |
| N | 1.250249000  | 1.910055000  | -0.343398000 |
| N | -1.250249000 | 1.910055000  | -0.343398000 |
| S | 0.000000000  | 2.952301000  | -0.536068000 |

### Ph-BT-Ph (Excited state S1)

B3LYP/6-311+G\*\* (SMD, solvent=acetonitrile)

|   |              |              |              |
|---|--------------|--------------|--------------|
| C | 1.462535000  | -0.455999000 | 0.052374000  |
| C | 0.724830000  | 0.779636000  | 0.090173000  |
| C | 0.685326000  | -1.655928000 | -0.004843000 |
| H | 1.193091000  | -2.610294000 | 0.007873000  |
| C | -0.724830000 | 0.779636000  | 0.090173000  |
| C | -0.685326000 | -1.655928000 | -0.004843000 |
| H | -1.193091000 | -2.610295000 | 0.007873000  |
| C | -1.462535000 | -0.455999000 | 0.052373000  |
| C | -2.910881000 | -0.533410000 | 0.073300000  |
| C | -3.721654000 | 0.513640000  | 0.591380000  |
| C | -3.577920000 | -1.692904000 | -0.415181000 |
| C | -5.102417000 | 0.398775000  | 0.624248000  |
| C | -4.958411000 | -1.788899000 | -0.395505000 |
| C | -5.732561000 | -0.746676000 | 0.128122000  |
| H | -3.248174000 | 1.401180000  | 0.982123000  |
| H | -3.006626000 | -2.505266000 | -0.844187000 |
| H | -5.695565000 | 1.204801000  | 1.041499000  |
| H | -5.440008000 | -2.675569000 | -0.791969000 |
| H | -6.813436000 | -0.828355000 | 0.149584000  |
| C | 2.910881000  | -0.533410000 | 0.073301000  |
| C | 3.577920000  | -1.692904000 | -0.415181000 |
| C | 3.721654000  | 0.513639000  | 0.591381000  |
| C | 4.958411000  | -1.788899000 | -0.395506000 |
| C | 5.102417000  | 0.398774000  | 0.624248000  |
| C | 5.732561000  | -0.746676000 | 0.128122000  |
| H | 3.006625000  | -2.505265000 | -0.844187000 |
| H | 3.248175000  | 1.401180000  | 0.982124000  |
| H | 5.440008000  | -2.675569000 | -0.791970000 |
| H | 5.695565000  | 1.204801000  | 1.041499000  |
| H | 6.813436000  | -0.828356000 | 0.149584000  |
| N | 1.271079000  | 2.006959000  | 0.069806000  |
| N | -1.271079000 | 2.006959000  | 0.069806000  |
| S | 0.000000000  | 3.110391000  | 0.073559000  |

### [Ph-BT-Ph]—O<sub>2</sub> complex (bridge)

B3LYP/6-311+G\*\* (SMD, solvent=acetonitrile)

|   |              |              |              |
|---|--------------|--------------|--------------|
| C | -1.466580000 | -0.370330000 | -0.339929000 |
| C | -0.725755000 | 0.826776000  | -0.030132000 |
| C | -0.702681000 | -1.479267000 | -0.687932000 |
| H | -1.209242000 | -2.390978000 | -0.979694000 |
| C | 0.725902000  | 0.826723000  | -0.030024000 |
| C | 0.702820000  | -1.479273000 | -0.687964000 |
| H | 1.209353000  | -2.390992000 | -0.979751000 |
| C | 1.466712000  | -0.370403000 | -0.339871000 |

|   |              |              |              |
|---|--------------|--------------|--------------|
| C | 2.942898000  | -0.417527000 | -0.357280000 |
| C | 3.707930000  | 0.662191000  | -0.831901000 |
| C | 3.612497000  | -1.578247000 | 0.069227000  |
| C | 5.096741000  | 0.576818000  | -0.884215000 |
| C | 5.001280000  | -1.654549000 | 0.026390000  |
| C | 5.749371000  | -0.577865000 | -0.452042000 |
| H | 3.215474000  | 1.560274000  | -1.179466000 |
| H | 3.043669000  | -2.416023000 | 0.454740000  |
| H | 5.669492000  | 1.414994000  | -1.265486000 |
| H | 5.499682000  | -2.553537000 | 0.371789000  |
| H | 6.831505000  | -0.638394000 | -0.486864000 |
| C | -2.942757000 | -0.417439000 | -0.357382000 |
| C | -3.612370000 | -1.578132000 | 0.069175000  |
| C | -3.707769000 | 0.662269000  | -0.832056000 |
| C | -5.001155000 | -1.654417000 | 0.026338000  |
| C | -5.096581000 | 0.576911000  | -0.884373000 |
| C | -5.749227000 | -0.577744000 | -0.452149000 |
| H | -3.043554000 | -2.415895000 | 0.454734000  |
| H | -3.215298000 | 1.560330000  | -1.179659000 |
| H | -5.499572000 | -2.553380000 | 0.371777000  |
| H | -5.669319000 | 1.415077000  | -1.265687000 |
| H | -6.831362000 | -0.638260000 | -0.486975000 |
| N | -1.249078000 | 1.999134000  | 0.328374000  |
| N | 1.249255000  | 1.999050000  | 0.328533000  |
| S | 0.000099000  | 3.015963000  | 0.634650000  |
| O | 0.620647000  | -1.127971000 | 2.080105000  |
| O | -0.622059000 | -1.128890000 | 2.079208000  |

**[Ph-BT-Ph]—O<sub>2</sub> complex (side-on)**

B3LYP/6-311+G\*\* (SMD, solvent=acetonitrile)

|   |              |              |              |
|---|--------------|--------------|--------------|
| C | 1.920928000  | -0.639322000 | 0.047366000  |
| C | 1.004739000  | 0.465480000  | 0.005565000  |
| C | 1.343192000  | -1.889123000 | 0.088189000  |
| H | 1.982517000  | -2.763218000 | 0.133054000  |
| C | -0.435185000 | 0.249676000  | 0.030695000  |
| C | -0.062988000 | -2.100045000 | 0.112478000  |
| H | -0.415908000 | -3.122890000 | 0.175443000  |
| C | -0.983393000 | -1.075307000 | 0.098006000  |
| C | -2.442363000 | -1.334452000 | 0.137662000  |
| C | -3.297794000 | -0.580817000 | 0.957555000  |
| C | -2.994378000 | -2.373850000 | -0.628940000 |
| C | -4.660601000 | -0.864725000 | 1.013206000  |
| C | -4.358494000 | -2.652383000 | -0.575863000 |
| C | -5.197454000 | -1.899350000 | 0.246043000  |
| H | -2.892898000 | 0.216913000  | 1.567371000  |
| H | -2.353812000 | -2.955796000 | -1.282122000 |
| H | -5.303390000 | -0.277743000 | 1.660295000  |
| H | -4.766171000 | -3.453846000 | -1.182350000 |

|   |              |              |              |
|---|--------------|--------------|--------------|
| H | -6.259383000 | -2.115339000 | 0.287090000  |
| C | 3.391971000  | -0.456291000 | 0.032282000  |
| C | 4.199719000  | -1.305245000 | -0.742403000 |
| C | 4.015640000  | 0.536313000  | 0.806157000  |
| C | 5.586180000  | -1.168443000 | -0.741129000 |
| C | 5.402516000  | 0.667628000  | 0.810003000  |
| C | 6.193840000  | -0.181814000 | 0.035808000  |
| H | 3.737974000  | -2.065927000 | -1.361868000 |
| H | 3.415451000  | 1.196132000  | 1.419735000  |
| H | 6.190754000  | -1.828991000 | -1.353115000 |
| H | 5.865568000  | 1.433912000  | 1.422229000  |
| H | 7.272938000  | -0.074343000 | 0.036504000  |
| N | 1.337388000  | 1.755348000  | -0.104310000 |
| N | -1.133940000 | 1.385719000  | -0.062732000 |
| S | -0.054824000 | 2.616853000  | -0.166598000 |
| O | -3.283336000 | 3.290312000  | -0.050003000 |
| O | -4.063795000 | 3.155493000  | -0.960435000 |

**BNA—[Ph-BT-Ph] complex**

B3LYP/6-311+G\*\* (SMD, solvent=acetonitrile)

|   |              |              |              |
|---|--------------|--------------|--------------|
| C | 2.619375000  | -0.608192000 | -0.420455000 |
| C | 1.727940000  | -0.442729000 | 0.692817000  |
| C | 2.094950000  | -1.273015000 | -1.506882000 |
| H | 2.722719000  | -1.442642000 | -2.374005000 |
| C | 0.371233000  | -0.970904000 | 0.655512000  |
| C | 0.772137000  | -1.793790000 | -1.541316000 |
| H | 0.469459000  | -2.332447000 | -2.431827000 |
| C | -0.115420000 | -1.681451000 | -0.493527000 |
| C | -1.480226000 | -2.256273000 | -0.560251000 |
| C | -2.049132000 | -2.925391000 | 0.535991000  |
| C | -2.223911000 | -2.169631000 | -1.748835000 |
| C | -3.316384000 | -3.496260000 | 0.440713000  |
| C | -3.492840000 | -2.737182000 | -1.840279000 |
| C | -4.044734000 | -3.403666000 | -0.745871000 |
| H | -1.492487000 | -3.013874000 | 1.460203000  |
| H | -1.812120000 | -1.640626000 | -2.600767000 |
| H | -3.734039000 | -4.016709000 | 1.295773000  |
| H | -4.052898000 | -2.651933000 | -2.765176000 |
| H | -5.032936000 | -3.844729000 | -0.816322000 |
| C | 4.008937000  | -0.091544000 | -0.413624000 |
| C | 4.537736000  | 0.522940000  | -1.560826000 |
| C | 4.837002000  | -0.228191000 | 0.712758000  |
| C | 5.852755000  | 0.982733000  | -1.582621000 |
| C | 6.153162000  | 0.227730000  | 0.686822000  |
| C | 6.666669000  | 0.836378000  | -0.459052000 |
| H | 3.910213000  | 0.655773000  | -2.434911000 |
| H | 4.455657000  | -0.707503000 | 1.605420000  |
| H | 6.238672000  | 1.461500000  | -2.476044000 |
| H | 6.779471000  | 0.103891000  | 1.563647000  |



|   |              |              |              |
|---|--------------|--------------|--------------|
| H | 7.690038000  | 1.194734000  | -0.475337000 |
| N | 2.000570000  | 0.218131000  | 1.822204000  |
| N | -0.329985000 | -0.685498000 | 1.757820000  |
| S | 0.654160000  | 0.168002000  | 2.754469000  |
| C | -3.233347000 | 2.547435000  | 0.445752000  |
| C | -1.934693000 | 3.046476000  | 0.287930000  |
| C | -4.089923000 | 2.553255000  | -0.663528000 |
| C | -1.497582000 | 3.530033000  | -0.946369000 |
| C | -3.658108000 | 3.035449000  | -1.898805000 |
| C | -2.358148000 | 3.524108000  | -2.044533000 |
| H | -1.261636000 | 3.060534000  | 1.140002000  |
| H | -5.104236000 | 2.179655000  | -0.556918000 |
| H | -0.488298000 | 3.914794000  | -1.048752000 |
| H | -4.336241000 | 3.035507000  | -2.745795000 |
| H | -2.021642000 | 3.901932000  | -3.003965000 |
| N | -3.598807000 | 0.507982000  | 1.893449000  |
| C | -3.693638000 | 1.975889000  | 1.774784000  |
| H | -4.736519000 | 2.256052000  | 1.948773000  |
| H | -3.102093000 | 2.415651000  | 2.582188000  |
| H | -2.636570000 | 0.205491000  | 1.752124000  |
| H | -4.146367000 | 0.067369000  | 1.158070000  |

**Table S3** Comparison with the existing literature based on benzothiadiazole for oxidative coupling of amines to imines.

| S.No. | Catalyst     | Light Source                                                | Amount of Catalyst        | Reactant Amount | Time  | Conversion                         | Reference          |
|-------|--------------|-------------------------------------------------------------|---------------------------|-----------------|-------|------------------------------------|--------------------|
| 1     | B-BT         | Blue LED 460nm                                              | 3mg                       | 1mmol           | 3hr   | 74%                                | [9] <sup>9</sup>   |
| 2     | CMP-BT@P-PAN | Visible light<br>(22 W/m <sup>2</sup> , $\lambda > 450$ nm) | 50mg                      | 0.02mmol        | 1hr   | 95%                                | [10] <sup>10</sup> |
| 3     | Py-BSZ-COF   | 15 W 520 nm LED bulb (5 mW cm <sup>-2</sup> )               | 5mg                       | 0.2mmol         | 12hr  | 99%                                | [11] <sup>11</sup> |
| 4     | BTDA-TAPT    | 300 W Xe lamp ( $\lambda = 420-780$ nm)                     | 6mg                       | 0.1mmol         | 6hr   | 97%                                | [12] <sup>12</sup> |
| 5     | TP-BTD-ABC   | Blue LED 460nm (3W $\times$ 4)                              | 5mg                       | 0.3mmol         | 40min | 72%                                | [13] <sup>13</sup> |
| 6     | CIBD-BTT     | 300 W Xe Lamp                                               | 10mg                      | 2mmol           | 6hr   | 82%                                | [14] <sup>14</sup> |
| 7     | TP-BTD-25    | Blue LEDs (3 W $\times$ 4)                                  | 5mg                       | 0.3mmol         | 0.5hr | 94%                                | [15] <sup>15</sup> |
| 8     | JNU-207      | Blue LED                                                    | 1mol%                     | 2eq.            | 24hr  | 94% yield                          | [16] <sup>16</sup> |
| 9     | JNU-211      | Blue LED                                                    | 4mg                       | 0.5mmol         | 12h   | 99%                                | [17] <sup>17</sup> |
| 10    | TBP          | 45W LED ( $\lambda > 400$ nm)                               | 15mg                      | 1mmol           | 2hr   | >99%                               | [18] <sup>18</sup> |
| 11    | 1-Zn         | 10 W Blue LED lamp (465 nm, 2252 mW/cm <sup>2</sup> )       | 5mg                       | 0.2mmol         | 2.5hr | 99% yield                          | [19] <sup>19</sup> |
| 12    | UiO-68-BT    | 415 nm LEDs (3 W $\times$ 4)                                | 5mg                       | 0.3mmol         | 25min | 96%                                | [20] <sup>20</sup> |
| 13    | PY-BT COF    | 300W Xenon lamp (200 mW cm <sup>-2</sup> )                  | 5mg                       | 0.1mmol         | 2.5hr | 99.9%                              | [21] <sup>21</sup> |
| 14    | Ph-BT-Ph*    | Natural Sunlight                                            | 0.13mol%<br>OR 75 $\mu$ g | 0.2mmol         | 2hr   | >99%<br>TOF* = 381 h <sup>-1</sup> | This work          |

**Table S4** Comparison with the existing literature for oxidative coupling of amines to imines in natural sunlight/xenon lamp/blue LED other than benzothiadiazole based system.

| S.No.     | Catalyst                                 | Light Source                                              | Amount of Catalyst          | Reactant Amount    | Time           | Conversion                                   | Reference          |
|-----------|------------------------------------------|-----------------------------------------------------------|-----------------------------|--------------------|----------------|----------------------------------------------|--------------------|
| 1         | TiO <sub>2</sub> /BiOBr                  | Natural Sunlight                                          | 0.1g                        | 0.125mmol          | 1hr            | 89.9%                                        | [22] <sup>22</sup> |
| 2         | WO <sub>3</sub> .H <sub>2</sub> O/Pd/CdS | Simulated Sunlight (360 ≤ λ ≤ 780 nm)                     | 6mg                         | 0.05mmol           | 2hr            | 95%                                          | [23] <sup>23</sup> |
| 3         | CWOH-1                                   | Natural Sunlight                                          | 20mg                        | 0.1mmol            | 7hr            | 94%                                          | [24] <sup>24</sup> |
| 4         | Tx-CMP                                   | Natural Sunlight                                          | 10mg                        | 0.5mmol            | 4hr            | >99%,<br>TOF = 12.4                          | [25] <sup>25</sup> |
| 5         | CeR-CN-66%                               | Xenon Arc Lamp                                            | 50mg                        | 100mg              | 5hr            | 82.2%                                        | [26] <sup>26</sup> |
| 6         | 3*                                       | Natural Sunlight                                          | 0.25mol%                    | 0.5mmol            | 1hr            | >99%                                         | [27] <sup>27</sup> |
| 7         | TPT-porp                                 | Natural Sunlight                                          | 5mg                         | 0.1mmol            | 6hr            | 65%                                          | [28] <sup>28</sup> |
| 8         | Ag <sub>3</sub> PO <sub>4</sub>          | Natural Sunlight                                          | 25mg                        | 1mmol              | 40min          | 95%,<br>TOF* = 57 h <sup>-1</sup>            | [29] <sup>29</sup> |
| 11        | (Au NBP)/t-TiO <sub>2</sub>              | Xe lamp                                                   | 10mg                        | 0.1mmol            | 8hr            | 91.9%                                        | [30] <sup>30</sup> |
| 12        | 1                                        | Xe Lamp Cutoff filter (AM 1.5G, 100 mW cm <sup>-2</sup> ) | 1mol%                       | 0.2mmol            | 24hr           | 96% yield                                    | [31] <sup>31</sup> |
| 13        | SAD                                      | Natural sunlight                                          | 15mg                        | 0.2mmol            | 6hr            | 38%                                          | [32] <sup>32</sup> |
| 14        | PAA-CMP                                  | Natural Sunlight                                          | 100mg                       | 18.7mmol           | 48hr           | 65% yield                                    | [33] <sup>33</sup> |
| 15        | eosin Y*                                 | Sunlight lamp (1000 Wm <sup>-2</sup> )                    | 1.5mol%                     | 5mM                | 1hr            | 89%,<br>TOF* = 192 h <sup>-1</sup>           | [34] <sup>34</sup> |
| 16        | C-CMP                                    | 150 W Xe lamp                                             | 20mg                        | 1mmol              | 4hr            | >99%                                         | [35] <sup>35</sup> |
| 17        | Au/SnS <sub>2</sub> NSs                  | Sunlight                                                  | 15mg                        | 0.2mmol            | 90min          | 98%                                          | [36] <sup>36</sup> |
| 18        | 11*                                      | 10 W Blue LED                                             | 10mol%                      | 0.5mmol            | 16hr           | 95% yield                                    | [37] <sup>37</sup> |
| 19        | CD <sub>1</sub>                          | Xe light<br>Natural Sunlight                              | 15mg<br>15mg                | 0.5mmol<br>0.5mmol | 60min<br>60min | 96%, TOF=32<br>90%, TOF=30                   | [38] <sup>38</sup> |
| <b>20</b> | <b>Ph-BT-Ph*</b>                         | <b>Natural Sunlight</b>                                   | <b>0.13mol%<br/>OR 75μg</b> | <b>0.2mmol</b>     | <b>2hr</b>     | <b>&gt;99%<br/>TOF* = 381 h<sup>-1</sup></b> | <b>This work</b>   |

- (\* in catalyst) Indicating homogenous system.
- TOF\* = mmol of benzylamine converted per mmol of catalyst per hour.
- TOF = mmol of benzylamine converted per gram of catalyst per hour.

## References:

1. M. J. Frisch, G. W. Trucks, H. B. Schlegel, G. E. Scuseria, M. A. Robb, J. R. Cheeseman, G. Scalmani, V. Barone, G. A. Petersson, H. Nakatsuji, X. Li, M. Caricato, A. V. Marenich, J. Bloino, B. G. Janesko, R. Gomperts, B. Mennucci, H. P. Hratchian, J. V. Ortiz, A. F. Izmaylov, J. L. Sonnenberg, Williams, F. Ding, F. Lipparini, F. Egidi, J. Goings, B. Peng, A. Petrone, T. Henderson, D. Ranasinghe, V. G. Zakrzewski, J. Gao, N. Rega, G. Zheng, W. Liang, M. Hada, M. Ehara, K. Toyota, R. Fukuda, J. Hasegawa, M. Ishida, T. Nakajima, Y. Honda, O. Kitao, H. Nakai, T. Vreven, K. Throssell, J. A. Montgomery Jr., J. E. Peralta, F. Ogliaro, M. J. Bearpark, J. J. Heyd, E. N. Brothers, K. N. Kudin, V. N. Staroverov, T. A. Keith, R. Kobayashi, J. Normand, K. Raghavachari, A. P. Rendell, J. C. Burant, S. S. Iyengar, J. Tomasi, M. Cossi, J. M. Millam, M. Klene, C. Adamo, R. Cammi, J. W. Ochterski, R. L. Martin, K. Morokuma, O. Farkas, J. B. Foresman and D. J. Fox, *Journal*, 2016.
2. A. D. Becke, *J. Chem. Phys.*, 1993, **98**, 5648-5652.
3. C. Lee, W. Yang and R. G. Parr, *Phys. Rev. B*, 1988, **37**, 785-789.
4. S. H. Vosko, L. Wilk and M. Nusair, *Can. J. Phys.*, 1980, **58**, 1200-1211.
5. B. H. Besler, K. M. Merz Jr and P. A. Kollman, *J. Comput. Chem.*, 1990, **11**, 431-439.
6. U. C. Singh and P. A. Kollman, *J. Comput. Chem.*, 1984, **5**, 129-145.
7. Y. Zhao, N. E. Schultz and D. G. Truhlar, *J. Chem. Theory Comput.*, 2006, **2**, 364-382.
8. A. V. Marenich, C. J. Cramer and D. G. Truhlar, *J. Phys. Chem. B*, 2009, **113**, 6378-6396.
9. Z. J. Wang, K. Garth, S. Ghasimi, K. Landfester and K. A. I. Zhang, *ChemSusChem*, 2015, **8**, 3459-3464.
10. J. J. Lee, W. Noh, T.-H. Huh, Y.-J. Kwark and T. S. Lee, *Polymer*, 2020, **211**, 123060.
11. S. Li, L. Li, Y. Li, L. Dai, C. Liu, Y. Liu, J. Li, J. Lv, P. Li and B. Wang, *ACS Catal.*, 2020, **10**, 8717-8726.
12. Q. Li, J. Wang, Y. Zhang, L. Ricardez-Sandoval, G. Bai and X. Lan, *ACS Appl. Mater. Interfaces.*, 2021, **13**, 39291-39303.
13. S. Yang, X. Li, Y. Qin, Y. Cheng, W. Fan, X. Lang, L. Zheng and Q. Cao, *ACS Appl. Mater. Interfaces.*, 2021, **13**, 29471-29481.
14. C. Chu, Y. Qin, C. Ni and J. Zou, *Chin. Chem. Lett.*, 2022, **33**, 2736-2740.
15. X. Li, S. Yang, F. Zhang, L. Zheng and X. Lang, *Appl. Catal. B: Environ.*, 2022, **303**, 120846.

16. K. Wu, J.-K. Jin, X.-Y. Liu, Y.-L. Huang, P.-W. Cheng, M. Xie, J. Zheng, W. Lu and D. Li, *J. Mater. Chem. C*, 2022, **10**, 11967-11974.
17. K. Wu, X.-Y. Liu, M. Xie, P.-W. Cheng, J. Zheng, W. Lu and D. Li, *Appl. Catal. B: Environ.*, 2023, **334**, 122847.
18. S. Ahmed, A. Kumar and P. S. Mukherjee, *ChemComm.*, 2023, **59**, 3229-3232.
19. Q.-Q. Li, P.-H. Pan, H. Liu, L. Zhou, S.-Y. Zhao, B. Deng, Y.-J. He, J.-X. Song, P. Liu, Y.-Y. Wang and J.-L. Li, *Inorg. Chem.*, 2023, **62**, 17182-17190.
20. B. Zeng, Y. Wang, F. Huang, K. Xiong, K. Zhang and X. Lang, *Catal. Sci. Technol.*, 2024, **14**, 2838-2847.
21. M.-Y. Yang, S.-B. Zhang, M. Zhang, Z.-H. Li, Y.-F. Liu, X. Liao, M. Lu, S.-L. Li and Y.-Q. Lan, *J. Am. Chem. Soc.*, 2024, **146**, 3396-3404.
22. S. Juntrapirom, D. Tantraviwat, O. Thongsook, S. Anuchai, S. Pornsuwan, D. Channei and B. Inceesungvorn, *Appl. Surf. Sci.*, 2021, **545**, 149015.
23. R. Wang, G. Qiu, Y. Xiao, X. Tao, W. Peng and B. Li, *J. Catal.*, 2019, **374**, 378-390.
24. Z. Yue, Y. Yu, T. Hu, Y. Wang, L. Cao, Y. Zhang, Y. Chang, L. Pei and J. Jia, *Mater. Today Chem.*, 2024, **36**, 101932.
25. V. R. Battula, H. Singh, S. Kumar, I. Bala, S. K. Pal and K. Kailasam, *ACS Catal.*, 2018, **8**, 6751-6759.
26. Y. Chai, L. Zhang, Q. Liu, F. Yang and W.-L. Dai, *ACS Sustain. Chem. Eng.*, 2018, **6**, 10526-10535.
27. J. Zhou, L. Mao, M.-X. Wu, Z. Peng, Y. Yang, M. Zhou, X.-L. Zhao, X. Shi and H.-B. Yang, *Chem. Sci.*, 2022, **13**, 5252-5260.
28. N. Saini, N. Sharma, D. K. Chauhan, R. Khurana, M. E. Ali and K. Kailasam, *J. Mater. Chem. A*, 2023, **11**, 25743-25755.
29. R. Garg, S. Mondal, L. Sahoo, C. P. Vinod and U. K. Gautam, *ACS Appl. Mater. Interfaces.*, **12**, 29324-29334.
30. G. He, Y. Lai, Y. Guo, H. Yin, B. Chang, M. Liu, S. Zhang, B. Yang and J. Wang, *ACS Appl. Mater. Interfaces.*, 2022, **14**, 53724-53735.
31. S. Li, G. Li, P. Ji, J. Zhang, S. Liu, J. Zhang and X. Chen, *ACS Appl. Mater. Interfaces.*, 2019, **11**, 43287-43293.
32. S. Mandal, B. Kommula and S. Bhattacharyya, *ACS Sustain. Chem. Eng.*, 2023, **11**, 14921-14931.
33. J. Jiang, X. Liu and R. Luo, *Catal. Lett.*, 2021, **151**, 3145-3153.

34. J. D. Tibbetts, D. R. Carbery and E. A. C. Emanuelsson, *ACS Sustain. Chem. Eng.*, 2017, **5**, 9826-9835.
35. C. Su, R. Tandiana, B. Tian, A. Sengupta, W. Tang, J. Su and K. P. Loh, *ACS Catal.*, 2016, **6**, 3594-3599.
36. S. Mondal, L. Sahoo, C. P. Vinod and U. K. Gautam, *Appl. Catal. B: Environ.*, 2021, **286**, 119927.
37. J. Zhao, H. Sun, Y. Lu, J. Li, Z. Yu, H. Zhu, C. Ma, Q. Meng and X. Peng, *Green Chem.*, 2022, **24**, 8503-8511.
38. B. Kommula, S. Chakraborty, M. Banoo, R. S. Roy, S. Sil, A. Swarnkar, B. Rawat, K. Kailasam and U. K. Gautam, *ACS Appl. Mater. Interfaces.*, 2024, **16**, 39470-39481.
